# Supplementary material for: Comparison of Single-Trait and Multi-Trait Genome-Wide Association Models and Inclusion of Correlated Traits in the Dissection of the Genetic Architecture of a Complex Trait in a Breeding Program
Source: Front Plant Sci. 2022 Jan 28;12:772907. doi: 10.3389/fpls.2021.772907 (PMC8831792; doi:10.3389/fpls.2021.772907)
Supplement: Supplementary file 2 [file Data_Sheet_2.xlsx]

## Sheet: ST-FDR
Population	Year	Model	Covariate	Marker	Chromosome	Position	Alleles	P.value	MAF	nobs	Favorable Allele	FDR_Adjusted_P.values	R2	Effect %
DP	2015	FarmCPU	Rht_Coleoptile	S1A_297737912	1A	297737912	G/A	2.8086e-07	0.0835095	473	G	0.00566889	0.00290085	4.03945
DP	2015	FarmCPU	None	S1A_297737912	1A	297737912	G/A	2.17403e-06	0.0835095	473	G	0.0146269	0.0039591	4.70291
DP	2015	FarmCPU	Coleoptile	S1A_297737912	1A	297737912	G/A	2.203e-06	0.0835095	473	G	0.014097	0.00397085	4.71049
DP	2015	BLINK	Rht_Coleoptile	S1A_38715697	1A	38715697	G/C	3.50924e-06	0.108879	473	G	0.0354152	0.0454996	13.6011
DP	2015	BLINK	Coleoptile	S1A_38715697	1A	38715697	G/C	1.10758e-06	0.108879	473	G	0.0111777	0.0467735	13.7853
DP	2015	BLINK	None	S1A_38715697	1A	38715697	G/C	1.06748e-06	0.108879	473	G	0.010773	0.0467806	13.7863
DP	2019	BLINK	Rht	S1A_535882220	1A	535882220	C/T	1.24701e-07	0.320296	473	C	0.00125848	0.0329885	11.7009
BL	2015	BLINK	None	S1A_539602166	1A	539602166	C/T	3.18953e-07	0.0978261	276	C	0.00160944	0.0614567	21.9411
DP	2015-2019	FarmCPU	Rht	S1B_629844888	1B	629844888	C/G	8.13307e-06	0.200846	473	C	0.0364795	0.0183382	6.27222
DP	2015-2019	FarmCPU	None	S1B_629844888	1B	629844888	C/G	5.56021e-06	0.200846	473	C	0.0249394	0.0205809	6.62434
BL	2015	BLINK	None	S1B_679383883	1B	679383883	A/T	1.08189e-09	0.0362319	276	A	1.09184e-05	0.0340441	16.508
DP	2018	FarmCPU	Coleoptile	S1D_50023619	1D	50023619	A/G	5.35174e-06	0.206131	473	G	0.0308627	0.0107703	5.43159
DP	2015-2019	FarmCPU	Coleoptile	S1D_68886298	1D	68886298	G/T	2.83503e-06	0.0443975	473	G	0.0155403	0.00837392	6.0071
DP	2015-2019	FarmCPU	None	S1D_68886298	1D	68886298	G/T	6.51698e-07	0.0443975	473	G	0.00876925	0.00847102	6.03524
DP	2015-2018	FarmCPU	None	S2A_102050091	2A	102050091	G/T	4.50218e-06	0.0972516	473	G	0.041749	0.0103471	4.55
DP	2015-2018	BLINK	Rht_Coleoptile	S2A_540049238	2A	540049238	C/T	6.58467e-07	0.348837	473	C	0.0132905	0.0213987	3.40658
DP	2015-2017	BLINK	Rht_Coleoptile	S2A_605310547	2A	605310547	G/T	2.48729e-07	0.404863	473	G	0.0033469	0.0367368	5.39403
DP	2015-2017	BLINK	Rht	S2A_605310547	2A	605310547	G/T	4.36643e-07	0.404863	473	G	0.00881321	0.0370978	5.41991
DP	2015-2017	FarmCPU	Rht	S2A_605310547	2A	605310547	G/T	1.3643e-08	0.404863	473	G	0.000550743	0.0370978	5.41991
DP	2015-2017	BLINK	None	S2A_605310547	2A	605310547	G/T	2.89203e-07	0.404863	473	G	0.00583727	0.0375548	5.45053
DP	2015-2017	FarmCPU	None	S2A_605310547	2A	605310547	G/T	5.15777e-08	0.404863	473	G	0.000929155	0.0375548	5.45053
DP	2015-2017	BLINK	Coleoptile	S2A_605310547	2A	605310547	G/T	2.92275e-07	0.404863	473	G	0.00589929	0.0375565	5.45326
DP	2015-2017	FarmCPU	Coleoptile	S2A_605310547	2A	605310547	G/T	5.39505e-08	0.404863	473	G	0.000963137	0.0375565	5.45326
DP	2015	FarmCPU	None	S2A_605310547	2A	605310547	G/T	6.2222e-08	0.404863	473	G	0.00125589	0.0342813	8.52988
DP	2015	FarmCPU	Coleoptile	S2A_605310547	2A	605310547	G/T	6.4406e-08	0.404863	473	G	0.00129997	0.0343749	8.54561
DP	2015	BLINK	Rht_Coleoptile	S2A_605598902	2A	605598902	G/A	2.07225e-07	0.451374	473	G	0.00278842	0.0326632	8.12544
DP	2015	BLINK	Coleoptile	S2A_605598902	2A	605598902	G/A	5.57774e-07	0.451374	473	G	0.0075054	0.0336312	8.24267
DP	2015	BLINK	None	S2A_605598902	2A	605598902	G/A	5.43343e-07	0.451374	473	G	0.00731122	0.0336327	8.24285
DP	2015-2018	BLINK	Rht	S2A_705340949	2A	705340949	A/G	6.33439e-07	0.193446	473	A	0.00639266	0.0261461	4.18729
DP	2015-2018	FarmCPU	Rht	S2A_705340949	2A	705340949	A/G	3.98396e-06	0.193446	473	A	0.0268041	0.0261461	4.18729
DP	2015-2018	BLINK	Rht_Coleoptile	S2A_705340949	2A	705340949	A/G	9.39156e-09	0.193446	473	A	0.000379118	0.0275867	4.28397
DP	2015-2018	BLINK	None	S2A_705340949	2A	705340949	A/G	2.56904e-07	0.193446	473	A	0.00259268	0.0279118	4.30807
DP	2015-2018	BLINK	Coleoptile	S2A_705340949	2A	705340949	A/G	5.73185e-07	0.193446	473	A	0.00771278	0.0281672	4.32828
DP	2017	BLINK	Rht_Coleoptile	S2A_711856698	2A	711856698	C/T	2.76499e-09	0.0792812	473	C	0.000111617	0.0495441	9.71025
BL	2015	FarmCPU	None	S2A_719360738	2A	719360738	T/C	8.43214e-06	0.132246	276	T	0.037821	0.0182695	10.2882
DP	2015-2017	FarmCPU	Rht	S2A_748461724	2A	748461724	G/A	2.89749e-06	0.364693	473	G	0.0227071	0.0089878	3.96707
DP	2015-2017	FarmCPU	None	S2A_748461724	2A	748461724	G/A	8.51084e-06	0.364693	473	G	0.0429457	0.00942205	4.05459
DP	2015-2017	FarmCPU	Coleoptile	S2A_748461724	2A	748461724	G/A	8.66554e-06	0.364693	473	G	0.0437263	0.00942824	4.05611
DP	2015-2019	FarmCPU	None	S2A_748461724	2A	748461724	G/A	2.68027e-06	0.364693	473	G	0.0135246	0.016095	4.3123
DP	2015-2019	FarmCPU	Coleoptile	S2A_748461724	2A	748461724	G/A	4.56828e-07	0.364693	473	G	0.00614708	0.0161293	4.31709
BL	2015	BLINK	None	S2A_751097199	2A	751097199	A/G	2.51899e-10	0.0434783	276	A	5.08433e-06	0.0903421	24.4517
BL	2015	BLINK	None	S2A_759822998	2A	759822998	G/A	1.90532e-07	0.128623	276	G	0.00109877	0.0131798	7.4338
DP	2015-2019	FarmCPU	Rht	S2B_13271813	2B	13271813	T/C	1.16015e-05	0.0295983	473	T	0.0468328	0.0210918	11.6849
DP	2015-2018	MLM	Rht_Coleoptile	S2B_301162652	2B	301162652	T/G	4.64068e-06	0.489429	473	T	0.0204334	0.0367489	4.17646
DP	2015-2018	BLINK	Coleoptile	S2B_301162652	2B	301162652	T/G	6.33145e-08	0.489429	473	T	0.00196491	0.0368317	4.18116
DP	2015-2018	MLM	Coleoptile	S2B_301162652	2B	301162652	T/G	2.99581e-06	0.489429	473	T	0.0166165	0.0368317	4.18116
DP	2015-2018	BLINK	None	S2B_301162652	2B	301162652	T/G	4.88128e-08	0.489429	473	T	0.000985239	0.037334	4.20774
DP	2015-2018	FarmCPU	None	S2B_301162652	2B	301162652	T/G	3.72028e-06	0.489429	473	T	0.041749	0.037334	4.20774
DP	2015-2018	MLM	None	S2B_301162652	2B	301162652	T/G	3.13775e-06	0.489429	473	T	0.0126665	0.037334	4.20774
DP	2015-2018	BLINK	Rht	S2B_301162652	2B	301162652	T/G	3.64709e-08	0.489429	473	T	0.00147226	0.0378576	4.23798
DP	2015-2018	FarmCPU	Rht	S2B_301162652	2B	301162652	T/G	7.87118e-07	0.489429	473	T	0.0079436	0.0378576	4.23798
DP	2015-2018	MLM	Rht	S2B_301162652	2B	301162652	T/G	3.00552e-06	0.489429	473	T	0.0121327	0.0378576	4.23798
DP	2015-2019	FarmCPU	Coleoptile	S2B_301162652	2B	301162652	T/G	2.88846e-06	0.489429	473	T	0.0155403	0.0491083	5.04545
DP	2015-2019	FarmCPU	None	S2B_301162652	2B	301162652	T/G	8.7402e-06	0.489429	473	T	0.032075	0.0492417	5.0501
DP	2015-2019	FarmCPU	Rht	S2B_301162652	2B	301162652	T/G	2.68762e-06	0.489429	473	T	0.0187252	0.0502213	5.10109
DP	2015-2019	FarmCPU	Coleoptile	S2B_403420819	2B	403420819	G/A	3.11454e-06	0.334038	473	A	0.0155403	0.0108117	4.4133
DP	2015-2019	FarmCPU	Rht_Coleoptile	S2B_403420819	2B	403420819	G/A	8.40548e-06	0.334038	473	A	0.0484732	0.0108384	4.41876
DP	2015-2018	FarmCPU	Rht	S2B_706703362	2B	706703362	T/G	5.88184e-08	0.270613	473	T	0.00237438	0.00993552	3.02241
DP	2015-2017	FarmCPU	Coleoptile	S2B_789673174	2B	789673174	A/G	3.10635e-07	0.339323	473	G	0.00313493	0.0226198	5.3284
DP	2015-2017	FarmCPU	None	S2B_789673174	2B	789673174	A/G	3.00772e-07	0.339323	473	G	0.00303539	0.0226266	5.32887
DP	2015-2017	FarmCPU	Rht	S2B_789673174	2B	789673174	A/G	8.99695e-07	0.339323	473	G	0.00907973	0.0235759	5.45203
DP	2015	MLM	None	S2B_789673174	2B	789673174	A/G	8.73523e-06	0.339323	473	G	0.0176312	0.0257511	9.31175
DP	2015	MLM	Coleoptile	S2B_789673174	2B	789673174	A/G	8.7983e-06	0.339323	473	G	0.0177585	0.0257734	9.31636
DP	2015	MLM	Rht	S2B_789673174	2B	789673174	A/G	7.21527e-06	0.339323	473	G	0.0145633	0.0269707	9.55165
DP	2015	MLM	None	S2B_789673192	2B	789673192	T/C	2.29425e-05	0.307611	473	C	0.0370457	0.0202594	8.74635
DP	2015	MLM	Coleoptile	S2B_789673192	2B	789673192	T/C	2.37985e-05	0.307611	473	C	0.0384279	0.0203906	8.78618
DP	2015	MLM	Rht	S2B_789673192	2B	789673192	T/C	2.0354e-05	0.307611	473	C	0.0342354	0.0214308	9.02001
DP	2015-2019	FarmCPU	Rht	S2D_533165857	2D	533165857	G/C	7.80905e-06	0.146934	473	G	0.0364795	0.00371934	1.82588
DP	2018	FarmCPU	Coleoptile	S3A_15958858	3A	15958858	G/A	4.1071e-06	0.102537	473	G	0.0286289	2.68323e-05	0.287065
DP	2018	FarmCPU	Rht_Coleoptile	S3A_15958858	3A	15958858	G/A	3.55301e-06	0.102537	473	G	0.0286856	2.80601e-05	0.293565
DP	2018	FarmCPU	None	S3A_625236844	3A	625236844	T/C	4.45296e-07	0.175476	473	T	0.00898785	0.00368141	2.3614
DP	2018	FarmCPU	Rht	S3A_625236844	3A	625236844	T/C	4.60583e-07	0.175476	473	T	0.00929641	0.00371449	2.37201
DP	2019	BLINK	Rht	S3A_737479165	3A	737479165	G/A	1.06229e-06	0.0665962	473	A	0.00857652	0.00827489	13.7483
DP	2015-2018	FarmCPU	None	S3B_683046369	3B	683046369	G/C	6.20526e-06	0.0877378	473	G	0.041749	0.00960645	3.43365
DP	2015-2018	FarmCPU	Rht	S3B_683046369	3B	683046369	G/C	1.41452e-07	0.0877378	473	G	0.00285507	0.00987542	3.4821
DP	2015-2019	BLINK	Rht	S3B_696329092	3B	696329092	G/A	1.36099e-07	0.475687	473	G	0.00183135	0.0323236	3.81663
DP	2015-2019	FarmCPU	None	S3B_696329092	3B	696329092	G/A	8.54845e-06	0.475687	473	G	0.032075	0.0353847	3.97961
DP	2015-2019	FarmCPU	Rht_Coleoptile	S3B_696329092	3B	696329092	G/A	1.51321e-08	0.475687	473	G	0.000305427	0.0361175	4.02336
DP	2015-2017	FarmCPU	Rht_Coleoptile	S3B_707906604	3B	707906604	G/A	4.50339e-06	0.237844	473	G	0.0454482	0.0162625	4.13357
DP	2018	BLINK	Rht	S3B_713887179	3B	713887179	T/C	4.06852e-07	0.159619	473	C	0.0164238	0.0299181	11.7812
DP	2018	BLINK	None	S3B_713887179	3B	713887179	T/C	2.90264e-07	0.159619	473	C	0.0117174	0.0310913	11.9899
DP	2015-2018	FarmCPU	None	S3B_752000980	3B	752000980	A/C	5.35056e-06	0.421776	473	C	0.041749	0.0100114	2.27843
BL	2015	FarmCPU	None	S3B_787474076	3B	787474076	G/A	1.0167e-07	0.494565	276	A	0.00136807	0.00683028	5.184
DP	2015-2017	FarmCPU	Coleoptile	S3D_551271772	3D	551271772	A/C	1.81039e-06	0.353066	473	A	0.0146164	0.0106371	6.16063
DP	2015-2017	FarmCPU	None	S3D_551271772	3D	551271772	A/C	1.76586e-06	0.353066	473	A	0.0142568	0.0106404	6.16146
DP	2015-2019	FarmCPU	Rht_Coleoptile	S4D_310458858	4D	310458858	C/A	9.93817e-08	0.0623679	473	C	0.00133728	0.00218395	2.56424
DP	2019	BLINK	Rht	S4D_453332016	4D	453332016	T/C	6.39321e-08	0.155391	473	C	0.00086027	0.0269927	24.4344
DP	2015-2019	BLINK	Rht	S5A_20846922	5A	20846922	T/C	1.13424e-07	0.212474	473	T	0.00183135	0.0274083	4.04082
DP	2015-2019	FarmCPU	None	S5A_30842348	5A	30842348	C/T	6.27868e-07	0.106765	473	C	0.00876925	0.0326884	5.72627
DP	2015-2019	FarmCPU	Coleoptile	S5A_30842348	5A	30842348	C/T	2.2368e-07	0.106765	473	C	0.00451476	0.0329579	5.75511
DP	2015-2019	FarmCPU	Rht	S5A_30842348	5A	30842348	C/T	3.97058e-09	0.106765	473	C	0.000160285	0.0331437	5.7664
DP	2015-2019	FarmCPU	Rht_Coleoptile	S5A_30842348	5A	30842348	C/T	1.85179e-09	0.106765	473	C	7.47529e-05	0.0356586	6.01848
DP	2015-2018	MLM	Rht_Coleoptile	S5A_473306956	5A	473306956	A/G	1.34251e-05	0.114165	473	A	0.0318791	0.0569895	7.17194
DP	2015-2018	MLM	Rht	S5A_473306956	5A	473306956	A/G	8.99217e-06	0.114165	473	A	0.0213527	0.057945	7.2297
DP	2015-2018	MLM	Coleoptile	S5A_473306956	5A	473306956	A/G	9.42884e-06	0.114165	473	A	0.0223896	0.0580283	7.23561
DP	2015-2018	MLM	None	S5A_473306956	5A	473306956	A/G	8.68423e-06	0.114165	473	A	0.0219103	0.0585393	7.26531
DP	2015-2018	MLM	Rht_Coleoptile	S5A_473308494	5A	473308494	T/C	8.14023e-06	0.118393	473	T	0.0234718	0.0563942	7.14463
DP	2015-2018	MLM	Coleoptile	S5A_473308494	5A	473308494	T/C	6.47263e-06	0.118393	473	T	0.0175587	0.0566828	7.16279
DP	2015-2018	MLM	Rht	S5A_473308494	5A	473308494	T/C	5.51352e-06	0.118393	473	T	0.0151857	0.0568947	7.17198
DP	2015-2018	MLM	None	S5A_473308494	5A	473308494	T/C	5.1158e-06	0.118393	473	T	0.014751	0.057475	7.20715
DP	2015-2018	MLM	Rht_Coleoptile	S5A_473321220	5A	473321220	T/C	6.03652e-06	0.110994	473	T	0.0221529	0.0598028	7.54258
DP	2015-2018	MLM	Coleoptile	S5A_473321220	5A	473321220	T/C	5.47465e-06	0.110994	473	T	0.0175587	0.0603532	7.57683
DP	2015-2018	MLM	Rht	S5A_473321220	5A	473321220	T/C	4.55339e-06	0.110994	473	T	0.0141393	0.060528	7.58379
DP	2015-2018	MLM	None	S5A_473321220	5A	473321220	T/C	4.34243e-06	0.110994	473	T	0.013942	0.0611476	7.62102
DP	2015-2018	MLM	Rht_Coleoptile	S5A_473407357	5A	473407357	G/A	4.67909e-06	0.108879	473	G	0.0204334	0.0583212	7.47745
DP	2015-2018	MLM	Coleoptile	S5A_473407357	5A	473407357	G/A	3.85727e-06	0.108879	473	G	0.0166165	0.0588806	7.51281
DP	2015-2018	MLM	Rht	S5A_473407357	5A	473407357	G/A	2.83199e-06	0.108879	473	G	0.0121327	0.0594719	7.53826
DP	2015-2018	MLM	None	S5A_473407357	5A	473407357	G/A	2.66797e-06	0.108879	473	G	0.0126665	0.0600383	7.57282
DP	2015-2018	MLM	Coleoptile	S5A_473644518	5A	473644518	C/T	4.9695e-06	0.11945	473	C	0.0175587	0.0617682	7.24192
DP	2015-2018	FarmCPU	Rht	S5A_473644518	5A	473644518	C/T	2.54363e-06	0.11945	473	C	0.0205363	0.062222	7.2609
DP	2015-2018	MLM	Rht	S5A_473644518	5A	473644518	C/T	3.85294e-06	0.11945	473	C	0.0141393	0.062222	7.2609
DP	2015-2018	BLINK	Rht_Coleoptile	S5A_473644518	5A	473644518	C/T	3.23593e-06	0.11945	473	C	0.0435427	0.0622156	7.26833
DP	2015-2018	MLM	Rht_Coleoptile	S5A_473644518	5A	473644518	C/T	4.82551e-06	0.11945	473	C	0.0204334	0.0622156	7.26833
DP	2015-2018	MLM	None	S5A_473644518	5A	473644518	C/T	3.59837e-06	0.11945	473	C	0.0132054	0.0627647	7.29145
DP	2015	MLM	Rht_Coleoptile	S5A_512259045	5A	512259045	G/T	5.61666e-07	0.0972516	473	G	0.00161953	0.0541476	16.5867
DP	2015	MLM	Rht	S5A_512259045	5A	512259045	G/T	2.51399e-07	0.0972516	473	G	0.000724891	0.0583158	17.1421
DP	2015	MLM	None	S5A_512259045	5A	512259045	G/T	2.65611e-07	0.0972516	473	G	0.000765871	0.0587126	17.1978
DP	2015	MLM	Coleoptile	S5A_512259045	5A	512259045	G/T	2.66119e-07	0.0972516	473	G	0.000767336	0.0587205	17.199
DP	2015	MLM	Rht_Coleoptile	S5A_512394193	5A	512394193	T/G	3.36556e-06	0.11945	473	T	0.00754783	0.0495301	13.9277
DP	2015	MLM	Rht	S5A_512394193	5A	512394193	T/G	3.24344e-06	0.11945	473	T	0.00727395	0.0508084	14.0945
DP	2015	MLM	None	S5A_512394193	5A	512394193	T/G	3.45338e-06	0.11945	473	T	0.00774479	0.0509779	14.1175
DP	2015	MLM	Coleoptile	S5A_512394193	5A	512394193	T/G	3.59482e-06	0.11945	473	T	0.00806199	0.0510843	14.1377
DP	2015	MLM	Rht_Coleoptile	S5A_512394234	5A	512394234	C/T	3.36556e-06	0.11945	473	C	0.00754783	0.0495301	13.9277
DP	2015	MLM	Rht	S5A_512394234	5A	512394234	C/T	3.24344e-06	0.11945	473	C	0.00727395	0.0508084	14.0945
DP	2015	MLM	None	S5A_512394234	5A	512394234	C/T	3.45338e-06	0.11945	473	C	0.00774479	0.0509779	14.1175
DP	2015	MLM	Coleoptile	S5A_512394234	5A	512394234	C/T	3.59482e-06	0.11945	473	C	0.00806199	0.0510843	14.1377
DP	2015	MLM	Rht_Coleoptile	S5A_512599946	5A	512599946	C/T	1.15233e-05	0.10148	473	C	0.0232586	0.0434342	14.138
DP	2015	MLM	Rht	S5A_512599946	5A	512599946	C/T	4.54642e-06	0.10148	473	C	0.00965946	0.0466985	14.5987
DP	2015	MLM	None	S5A_512599946	5A	512599946	C/T	4.75704e-06	0.10148	473	C	0.010107	0.0469242	14.6331
DP	2015	MLM	Coleoptile	S5A_512599946	5A	512599946	C/T	5.00609e-06	0.10148	473	C	0.0106361	0.0471097	14.6755
DP	2015-2018	MLM	Rht_Coleoptile	S5A_512767007	5A	512767007	G/A	5.06179e-06	0.117336	473	G	0.0204334	0.0261031	4.97467
DP	2015-2018	MLM	Coleoptile	S5A_512767007	5A	512767007	G/A	2.44414e-06	0.117336	473	G	0.0164442	0.0281849	5.16033
DP	2015-2018	MLM	Rht	S5A_512767007	5A	512767007	G/A	1.95423e-06	0.117336	473	G	0.0121327	0.0287865	5.20847
DP	2015-2018	MLM	None	S5A_512767007	5A	512767007	G/A	2.02339e-06	0.117336	473	G	0.0126665	0.0289198	5.22042
DP	2015-2017	MLM	Rht_Coleoptile	S5A_512767007	5A	512767007	G/A	6.00134e-06	0.117336	473	G	0.0259965	0.041899	8.09408
DP	2015-2017	MLM	Rht	S5A_512767007	5A	512767007	G/A	2.65761e-06	0.117336	473	G	0.0121064	0.045098	8.37224
DP	2015-2017	MLM	None	S5A_512767007	5A	512767007	G/A	2.73471e-06	0.117336	473	G	0.0125627	0.0452007	8.38161
DP	2015-2017	MLM	Coleoptile	S5A_512767007	5A	512767007	G/A	2.84466e-06	0.117336	473	G	0.0130849	0.0452558	8.39757
DP	2015	MLM	Rht_Coleoptile	S5A_512767007	5A	512767007	G/A	1.51177e-07	0.117336	473	G	0.000554791	0.0683135	16.9288
DP	2015	MLM	Rht	S5A_512767007	5A	512767007	G/A	6.71995e-08	0.117336	473	G	0.000247013	0.0711596	17.2261
DP	2015	MLM	None	S5A_512767007	5A	512767007	G/A	7.09074e-08	0.117336	473	G	0.000260217	0.0713168	17.2448
DP	2015	MLM	Coleoptile	S5A_512767007	5A	512767007	G/A	7.59895e-08	0.117336	473	G	0.000278868	0.0716456	17.3069
DP	2015-2018	MLM	Rht	S5A_513404692	5A	513404692	T/C	2.13107e-05	0.115222	473	T	0.0430136	0.0240462	4.85623
DP	2015-2018	MLM	None	S5A_513404692	5A	513404692	T/C	2.23552e-05	0.115222	473	T	0.0474965	0.0241639	4.86802
DP	2015-2017	MLM	Rht_Coleoptile	S5A_513404692	5A	513404692	T/C	4.45367e-06	0.115222	473	T	0.0224732	0.0431796	8.37868
DP	2015-2017	MLM	Rht	S5A_513404692	5A	513404692	T/C	2.6991e-06	0.115222	473	T	0.0121064	0.0457108	8.59869
DP	2015-2017	MLM	None	S5A_513404692	5A	513404692	T/C	2.80083e-06	0.115222	473	T	0.0125627	0.0458105	8.60793
DP	2015-2017	MLM	Coleoptile	S5A_513404692	5A	513404692	T/C	2.91726e-06	0.115222	473	T	0.0130849	0.0458814	8.62756
DP	2015	MLM	Rht_Coleoptile	S5A_513404692	5A	513404692	T/C	6.13054e-08	0.115222	473	T	0.000309347	0.0717049	17.6855
DP	2015	MLM	Rht	S5A_513404692	5A	513404692	T/C	3.58151e-08	0.115222	473	T	0.000160643	0.0738925	17.9074
DP	2015	MLM	None	S5A_513404692	5A	513404692	T/C	3.80787e-08	0.115222	473	T	0.000170795	0.0740471	17.9258
DP	2015	MLM	Coleoptile	S5A_513404692	5A	513404692	T/C	4.10151e-08	0.115222	473	T	0.000183966	0.074429	17.999
DP	2015-2018	MLM	Coleoptile	S5A_514092714	5A	514092714	T/C	2.26623e-05	0.121564	473	T	0.0481489	0.0220217	4.42799
DP	2015-2018	MLM	Rht	S5A_514092714	5A	514092714	T/C	1.77253e-05	0.121564	473	T	0.0376598	0.0226541	4.48455
DP	2015-2018	MLM	None	S5A_514092714	5A	514092714	T/C	1.83139e-05	0.121564	473	T	0.0410721	0.0227193	4.49097
DP	2015-2017	MLM	Rht_Coleoptile	S5A_514092714	5A	514092714	T/C	1.14345e-05	0.121564	473	T	0.0305126	0.037738	7.46713
DP	2015-2017	MLM	Rht	S5A_514092714	5A	514092714	T/C	3.54917e-06	0.121564	473	T	0.0143273	0.0418553	7.8283
DP	2015-2017	MLM	None	S5A_514092714	5A	514092714	T/C	3.62968e-06	0.121564	473	T	0.0146523	0.04191	7.83338
DP	2015-2017	MLM	Coleoptile	S5A_514092714	5A	514092714	T/C	3.77815e-06	0.121564	473	T	0.0152517	0.0419699	7.8505
DP	2015	MLM	Rht_Coleoptile	S5A_514092714	5A	514092714	T/C	2.43916e-07	0.121564	473	T	0.000760766	0.0624963	15.7398
DP	2015	MLM	Rht	S5A_514092714	5A	514092714	T/C	8.13076e-08	0.121564	473	T	0.000273519	0.0662544	16.1327
DP	2015	MLM	None	S5A_514092714	5A	514092714	T/C	8.45137e-08	0.121564	473	T	0.000284304	0.0663384	16.1429
DP	2015	MLM	Coleoptile	S5A_514092714	5A	514092714	T/C	9.04914e-08	0.121564	473	T	0.000304413	0.0666822	16.2085
BL	2015	FarmCPU	None	S5A_514260464	5A	514260464	C/T	7.864e-07	0.231884	276	C	0.00634908	0.132837	16.7595
DP	2015-2018	MLM	Rht_Coleoptile	S5A_514260464	5A	514260464	C/T	1.89067e-05	0.105708	473	C	0.0424014	0.0222242	4.85647
DP	2015-2018	MLM	Coleoptile	S5A_514260464	5A	514260464	C/T	6.47604e-06	0.105708	473	C	0.0175587	0.0249251	5.12544
DP	2015-2018	MLM	Rht	S5A_514260464	5A	514260464	C/T	4.38996e-06	0.105708	473	C	0.0141393	0.025679	5.19
DP	2015-2018	MLM	None	S5A_514260464	5A	514260464	C/T	4.48985e-06	0.105708	473	C	0.013942	0.0258445	5.20654
DP	2015-2017	MLM	Rht_Coleoptile	S5A_514260464	5A	514260464	C/T	2.27491e-06	0.105708	473	C	0.0131191	0.0432312	8.69869
DP	2015-2017	MLM	Rht	S5A_514260464	5A	514260464	C/T	6.3274e-07	0.105708	473	C	0.00364892	0.0477023	9.08437
DP	2015-2017	MLM	None	S5A_514260464	5A	514260464	C/T	6.41949e-07	0.105708	473	C	0.00370203	0.0478405	9.09724
DP	2015-2017	MLM	Coleoptile	S5A_514260464	5A	514260464	C/T	6.69107e-07	0.105708	473	C	0.00385864	0.0479848	9.13297
DP	2015	MLM	Rht_Coleoptile	S5A_514260464	5A	514260464	C/T	5.45017e-09	0.105708	473	C	8.79196e-05	0.0751002	18.7795
DP	2015	MLM	Rht	S5A_514260464	5A	514260464	C/T	1.62302e-09	0.105708	473	C	2.81539e-05	0.0790697	19.1575
DP	2015	MLM	None	S5A_514260464	5A	514260464	C/T	1.66956e-09	0.105708	473	C	2.99778e-05	0.0792865	19.1831
DP	2015	MLM	Coleoptile	S5A_514260464	5A	514260464	C/T	1.80656e-09	0.105708	473	C	3.09618e-05	0.0798784	19.3011
DP	2015-2018	MLM	Rht_Coleoptile	S5A_514279902	5A	514279902	A/G	7.9932e-06	0.116279	473	A	0.0234718	0.0234541	4.73022
DP	2015-2018	MLM	Coleoptile	S5A_514279902	5A	514279902	A/G	4.11626e-06	0.116279	473	A	0.0166165	0.0255163	4.92456
DP	2015-2018	MLM	Rht	S5A_514279902	5A	514279902	A/G	2.93865e-06	0.116279	473	A	0.0121327	0.0262039	4.98239
DP	2015-2018	MLM	None	S5A_514279902	5A	514279902	A/G	3.11893e-06	0.116279	473	A	0.0126665	0.0262967	4.99115
DP	2015-2017	MLM	Rht_Coleoptile	S5A_514279902	5A	514279902	A/G	1.22465e-06	0.116279	473	A	0.00823943	0.0448638	8.40171
DP	2015-2017	MLM	Rht	S5A_514279902	5A	514279902	A/G	5.49786e-07	0.116279	473	A	0.00364892	0.0483092	8.68795
DP	2015-2017	MLM	None	S5A_514279902	5A	514279902	A/G	5.74649e-07	0.116279	473	A	0.00370203	0.0483869	8.69484
DP	2015-2017	MLM	Coleoptile	S5A_514279902	5A	514279902	A/G	6.00656e-07	0.116279	473	A	0.00385864	0.0484728	8.71675
DP	2015	MLM	Rht_Coleoptile	S5A_514279902	5A	514279902	A/G	2.45265e-08	0.116279	473	A	0.000141441	0.0698856	17.176
DP	2015	MLM	Rht	S5A_514279902	5A	514279902	A/G	1.11267e-08	0.116279	473	A	6.41661e-05	0.0728683	17.4775
DP	2015	MLM	None	S5A_514279902	5A	514279902	A/G	1.18759e-08	0.116279	473	A	6.84866e-05	0.0729845	17.4913
DP	2015	MLM	Coleoptile	S5A_514279902	5A	514279902	A/G	1.28213e-08	0.116279	473	A	7.39385e-05	0.0733866	17.568
DP	2015-2018	MLM	Rht_Coleoptile	S5A_514279958	5A	514279958	A/G	7.9932e-06	0.116279	473	A	0.0234718	0.0234541	4.73022
DP	2015-2018	MLM	Coleoptile	S5A_514279958	5A	514279958	A/G	4.11626e-06	0.116279	473	A	0.0166165	0.0255163	4.92456
DP	2015-2018	MLM	Rht	S5A_514279958	5A	514279958	A/G	2.93865e-06	0.116279	473	A	0.0121327	0.0262039	4.98239
DP	2015-2018	MLM	None	S5A_514279958	5A	514279958	A/G	3.11893e-06	0.116279	473	A	0.0126665	0.0262967	4.99115
DP	2015-2017	MLM	Rht_Coleoptile	S5A_514279958	5A	514279958	A/G	1.22465e-06	0.116279	473	A	0.00823943	0.0448638	8.40171
DP	2015-2017	MLM	Rht	S5A_514279958	5A	514279958	A/G	5.49786e-07	0.116279	473	A	0.00364892	0.0483092	8.68795
DP	2015-2017	MLM	None	S5A_514279958	5A	514279958	A/G	5.74649e-07	0.116279	473	A	0.00370203	0.0483869	8.69484
DP	2015-2017	MLM	Coleoptile	S5A_514279958	5A	514279958	A/G	6.00656e-07	0.116279	473	A	0.00385864	0.0484728	8.71675
DP	2015	MLM	Rht_Coleoptile	S5A_514279958	5A	514279958	A/G	2.45265e-08	0.116279	473	A	0.000141441	0.0698856	17.176
DP	2015	MLM	Rht	S5A_514279958	5A	514279958	A/G	1.11267e-08	0.116279	473	A	6.41661e-05	0.0728683	17.4775
DP	2015	MLM	None	S5A_514279958	5A	514279958	A/G	1.18759e-08	0.116279	473	A	6.84866e-05	0.0729845	17.4913
DP	2015	MLM	Coleoptile	S5A_514279958	5A	514279958	A/G	1.28213e-08	0.116279	473	A	7.39385e-05	0.0733866	17.568
DP	2015-2018	MLM	Rht_Coleoptile	S5A_514296253	5A	514296253	G/A	7.48519e-07	0.112051	473	G	0.00755405	0.0293646	5.34219
DP	2015-2018	MLM	Coleoptile	S5A_514296253	5A	514296253	G/A	2.49566e-07	0.112051	473	G	0.00251862	0.0322996	5.58524
DP	2015-2018	MLM	Rht	S5A_514296253	5A	514296253	G/A	2.60348e-07	0.112051	473	G	0.00262743	0.0325241	5.60324
DP	2015-2018	MLM	None	S5A_514296253	5A	514296253	G/A	2.75266e-07	0.112051	473	G	0.00277799	0.0326727	5.61591
DP	2015-2017	MLM	Rht_Coleoptile	S5A_514296253	5A	514296253	G/A	3.08642e-07	0.112051	473	G	0.00311481	0.0485224	8.81913
DP	2015-2017	MLM	Rht	S5A_514296253	5A	514296253	G/A	8.86585e-08	0.112051	473	G	0.000894742	0.053204	9.20356
DP	2015-2017	MLM	None	S5A_514296253	5A	514296253	G/A	9.21222e-08	0.112051	473	G	0.000929697	0.0533207	9.21347
DP	2015-2017	MLM	Coleoptile	S5A_514296253	5A	514296253	G/A	9.41911e-08	0.112051	473	G	0.000950576	0.0533186	9.21572
DP	2015	MLM	Rht_Coleoptile	S5A_514296253	5A	514296253	G/A	1.08898e-08	0.112051	473	G	8.79196e-05	0.0729203	17.7087
DP	2015	MLM	Rht	S5A_514296253	5A	514296253	G/A	3.48715e-09	0.112051	473	G	2.81539e-05	0.0771663	18.1554
DP	2015	MLM	None	S5A_514296253	5A	514296253	G/A	3.71307e-09	0.112051	473	G	2.99778e-05	0.0773379	18.1752
DP	2015	MLM	Coleoptile	S5A_514296253	5A	514296253	G/A	3.83494e-09	0.112051	473	G	3.09618e-05	0.0774466	18.1928
DP	2015-2018	MLM	Rht_Coleoptile	S5A_514296259	5A	514296259	C/T	7.48519e-07	0.112051	473	C	0.00755405	0.0293646	5.34219
DP	2015-2018	MLM	Coleoptile	S5A_514296259	5A	514296259	C/T	2.49566e-07	0.112051	473	C	0.00251862	0.0322996	5.58524
DP	2015-2018	MLM	Rht	S5A_514296259	5A	514296259	C/T	2.60348e-07	0.112051	473	C	0.00262743	0.0325241	5.60324
DP	2015-2018	MLM	None	S5A_514296259	5A	514296259	C/T	2.75266e-07	0.112051	473	C	0.00277799	0.0326727	5.61591
DP	2015-2017	MLM	Rht_Coleoptile	S5A_514296259	5A	514296259	C/T	3.08642e-07	0.112051	473	C	0.00311481	0.0485224	8.81913
DP	2015-2017	MLM	Rht	S5A_514296259	5A	514296259	C/T	8.86585e-08	0.112051	473	C	0.000894742	0.053204	9.20356
DP	2015-2017	MLM	None	S5A_514296259	5A	514296259	C/T	9.21222e-08	0.112051	473	C	0.000929697	0.0533207	9.21347
DP	2015-2017	MLM	Coleoptile	S5A_514296259	5A	514296259	C/T	9.41911e-08	0.112051	473	C	0.000950576	0.0533186	9.21572
DP	2015	MLM	Rht_Coleoptile	S5A_514296259	5A	514296259	C/T	1.08898e-08	0.112051	473	C	8.79196e-05	0.0729203	17.7087
DP	2015	MLM	Rht	S5A_514296259	5A	514296259	C/T	3.48715e-09	0.112051	473	C	2.81539e-05	0.0771663	18.1554
DP	2015	MLM	None	S5A_514296259	5A	514296259	C/T	3.71307e-09	0.112051	473	C	2.99778e-05	0.0773379	18.1752
DP	2015	MLM	Coleoptile	S5A_514296259	5A	514296259	C/T	3.83494e-09	0.112051	473	C	3.09618e-05	0.0774466	18.1928
DP	2015	MLM	None	S5A_514296299	5A	514296299	A/G	1.67947e-05	0.209302	473	A	0.0300418	0.0528258	13.5817
DP	2015	MLM	Rht	S5A_514296299	5A	514296299	A/G	1.51037e-05	0.209302	473	A	0.026509	0.0530058	13.6052
DP	2015	MLM	Coleoptile	S5A_514296299	5A	514296299	A/G	1.74907e-05	0.209302	473	A	0.0306985	0.0530578	13.6265
DP	2015-2017	MLM	Rht_Coleoptile	S5A_514408271	5A	514408271	C/T	6.75459e-06	0.114165	473	C	0.0259965	0.0406622	8.15629
DP	2015-2017	MLM	Rht	S5A_514408271	5A	514408271	C/T	6.19687e-06	0.114165	473	C	0.0208463	0.042078	8.28018
DP	2015-2017	MLM	None	S5A_514408271	5A	514408271	C/T	6.33233e-06	0.114165	473	C	0.021302	0.0421822	8.29026
DP	2015-2017	MLM	Coleoptile	S5A_514408271	5A	514408271	C/T	6.58831e-06	0.114165	473	C	0.0221631	0.0422552	8.31129
DP	2015	MLM	Rht_Coleoptile	S5A_514408271	5A	514408271	C/T	7.80689e-08	0.114165	473	C	0.000315149	0.0674972	17.2127
DP	2015	MLM	Rht	S5A_514408271	5A	514408271	C/T	6.73094e-08	0.114165	473	C	0.000247013	0.0685685	17.3134
DP	2015	MLM	None	S5A_514408271	5A	514408271	C/T	6.96454e-08	0.114165	473	C	0.000260217	0.0687306	17.3335
DP	2015	MLM	Coleoptile	S5A_514408271	5A	514408271	C/T	7.49172e-08	0.114165	473	C	0.000278868	0.0691214	17.4118
DP	2015-2018	MLM	Rht_Coleoptile	S5A_519892082	5A	519892082	C/G	1.32173e-05	0.107822	473	C	0.0318791	0.0229768	4.89731
DP	2015-2018	MLM	Coleoptile	S5A_519892082	5A	519892082	C/G	6.5245e-06	0.107822	473	C	0.0175587	0.0250814	5.1065
DP	2015-2018	MLM	Rht	S5A_519892082	5A	519892082	C/G	5.64271e-06	0.107822	473	C	0.0151857	0.0254588	5.14156
DP	2015-2018	MLM	None	S5A_519892082	5A	519892082	C/G	5.94375e-06	0.107822	473	C	0.0159958	0.0255857	5.15427
DP	2015-2017	MLM	Rht_Coleoptile	S5A_519892082	5A	519892082	C/G	1.08048e-05	0.107822	473	C	0.0305126	0.0387808	8.17088
DP	2015-2017	MLM	Rht	S5A_519892082	5A	519892082	C/G	4.79189e-06	0.107822	473	C	0.0175854	0.0421423	8.49538
DP	2015-2017	MLM	None	S5A_519892082	5A	519892082	C/G	4.97695e-06	0.107822	473	C	0.0182645	0.0422427	8.50534
DP	2015-2017	MLM	Coleoptile	S5A_519892082	5A	519892082	C/G	5.13633e-06	0.107822	473	C	0.0188494	0.0422549	8.51202
DP	2015	MLM	Rht_Coleoptile	S5A_519892082	5A	519892082	C/G	7.59098e-08	0.107822	473	C	0.000315149	0.0671173	17.607
DP	2015	MLM	Rht	S5A_519892082	5A	519892082	C/G	3.40946e-08	0.107822	473	C	0.000160643	0.0703048	17.9732
DP	2015	MLM	None	S5A_519892082	5A	519892082	C/G	3.61067e-08	0.107822	473	C	0.000170795	0.0704629	17.993
DP	2015	MLM	Coleoptile	S5A_519892082	5A	519892082	C/G	3.82611e-08	0.107822	473	C	0.000183966	0.0706543	18.029
DP	2015-2017	MLM	Rht	S5A_520532187	5A	520532187	T/G	1.75943e-05	0.102537	473	G	0.0400566	0.0403342	8.30911
DP	2015-2017	MLM	None	S5A_520532187	5A	520532187	T/G	1.81271e-05	0.102537	473	G	0.0430443	0.0404857	8.32432
DP	2015-2017	MLM	Coleoptile	S5A_520532187	5A	520532187	T/G	1.86635e-05	0.102537	473	G	0.044318	0.040494	8.33011
DP	2015	MLM	Rht_Coleoptile	S5A_520532187	5A	520532187	T/G	2.44995e-07	0.102537	473	G	0.000760766	0.0654674	17.3704
DP	2015	MLM	Rht	S5A_520532187	5A	520532187	T/G	1.50217e-07	0.102537	473	G	0.000466457	0.0678376	17.6507
DP	2015	MLM	None	S5A_520532187	5A	520532187	T/G	1.57507e-07	0.102537	473	G	0.000489095	0.0680768	17.681
DP	2015	MLM	Coleoptile	S5A_520532187	5A	520532187	T/G	1.66661e-07	0.102537	473	G	0.000517522	0.0682527	17.7143
BL	2015	FarmCPU	None	S5A_522153944	5A	522153944	T/C	1.69131e-06	0.0398551	276	C	0.0113791	0.116969	29.9646
BL	2015	MLM	None	S5A_522153944	5A	522153944	T/C	9.29169e-07	0.0398551	276	C	0.0187544	0.116969	29.9646
DP	2015-2019	BLINK	Rht_Coleoptile	S5A_522153944	5A	522153944	T/C	1.12853e-07	0.0443975	473	C	0.00455564	0.0571909	11.813
DP	2015-2019	FarmCPU	Rht_Coleoptile	S5A_522153944	5A	522153944	T/C	9.9536e-07	0.0443975	473	C	0.0100452	0.0571909	11.813
DP	2015-2019	BLINK	Coleoptile	S5A_522153944	5A	522153944	T/C	1.82176e-09	0.0443975	473	C	7.35408e-05	0.0577221	11.8656
DP	2015-2019	FarmCPU	Coleoptile	S5A_522153944	5A	522153944	T/C	6.15373e-06	0.0443975	473	C	0.0225831	0.0577221	11.8656
DP	2015-2019	BLINK	None	S5A_522153944	5A	522153944	T/C	1.7429e-09	0.0443975	473	C	7.03572e-05	0.0577738	11.8704
DP	2015-2019	BLINK	Rht	S5A_522153944	5A	522153944	T/C	7.14731e-09	0.0443975	473	C	0.000288523	0.0596389	12.0676
DP	2015-2019	FarmCPU	Rht	S5A_522153944	5A	522153944	T/C	2.78318e-06	0.0443975	473	C	0.0187252	0.0596389	12.0676
DP	2015-2018	MLM	Rht_Coleoptile	S5A_522153944	5A	522153944	T/C	8.58868e-09	0.0443975	473	C	0.000173354	0.0986912	14.849
DP	2015-2018	BLINK	Coleoptile	S5A_522153944	5A	522153944	T/C	1.83178e-06	0.0443975	473	C	0.0184863	0.0999976	14.9443
DP	2015-2018	MLM	Coleoptile	S5A_522153944	5A	522153944	T/C	2.66866e-09	0.0443975	473	C	5.38641e-05	0.0999976	14.9443
DP	2015-2018	BLINK	None	S5A_522153944	5A	522153944	T/C	1.38467e-07	0.0443975	473	C	0.00186322	0.100248	14.9624
DP	2015-2018	FarmCPU	None	S5A_522153944	5A	522153944	T/C	5.12512e-06	0.0443975	473	C	0.041749	0.100248	14.9624
DP	2015-2018	MLM	None	S5A_522153944	5A	522153944	T/C	2.21483e-09	0.0443975	473	C	4.47041e-05	0.100248	14.9624
DP	2015-2018	BLINK	Rht	S5A_522153944	5A	522153944	T/C	1.68172e-07	0.0443975	473	C	0.00226292	0.101803	15.0869
DP	2015-2018	FarmCPU	Rht	S5A_522153944	5A	522153944	T/C	3.05361e-07	0.0443975	473	C	0.00410893	0.101803	15.0869
DP	2015-2018	MLM	Rht	S5A_522153944	5A	522153944	T/C	1.75873e-09	0.0443975	473	C	3.54981e-05	0.101803	15.0869
DP	2015-2017	BLINK	Rht_Coleoptile	S5A_522153944	5A	522153944	T/C	2.16523e-11	0.0443975	473	C	8.7406e-07	0.0792006	17.0832
DP	2015-2017	MLM	Rht_Coleoptile	S5A_522153944	5A	522153944	T/C	2.4314e-08	0.0443975	473	C	0.000490754	0.0792006	17.0832
DP	2015-2017	BLINK	Coleoptile	S5A_522153944	5A	522153944	T/C	3.27344e-12	0.0443975	473	C	1.32142e-07	0.0807038	17.2415
DP	2015-2017	MLM	Coleoptile	S5A_522153944	5A	522153944	T/C	7.7747e-09	0.0443975	473	C	0.000156925	0.0807038	17.2415
DP	2015-2017	BLINK	None	S5A_522153944	5A	522153944	T/C	3.1106e-12	0.0443975	473	C	1.25569e-07	0.0807118	17.2417
DP	2015-2017	MLM	None	S5A_522153944	5A	522153944	T/C	7.40941e-09	0.0443975	473	C	0.000149551	0.0807118	17.2417
DP	2015-2017	MLM	Rht	S5A_522153944	5A	522153944	T/C	6.30647e-09	0.0443975	473	C	0.00012729	0.0816058	17.3471
DP	2015	MLM	Rht_Coleoptile	S5A_522153944	5A	522153944	T/C	9.75234e-09	0.0443975	473	C	8.79196e-05	0.0861828	29.1894
DP	2015	BLINK	None	S5A_522153944	5A	522153944	T/C	1.51054e-11	0.0443975	473	C	6.09774e-07	0.0874014	29.3886
DP	2015	FarmCPU	None	S5A_522153944	5A	522153944	T/C	2.72649e-06	0.0443975	473	C	0.0157233	0.0874014	29.3886
DP	2015	MLM	None	S5A_522153944	5A	522153944	T/C	3.37626e-09	0.0443975	473	C	2.99778e-05	0.0874014	29.3886
DP	2015	BLINK	Coleoptile	S5A_522153944	5A	522153944	T/C	1.57647e-11	0.0443975	473	C	6.3639e-07	0.087435	29.3954
DP	2015	FarmCPU	Coleoptile	S5A_522153944	5A	522153944	T/C	2.44448e-06	0.0443975	473	C	0.014097	0.087435	29.3954
DP	2015	MLM	Coleoptile	S5A_522153944	5A	522153944	T/C	3.61564e-09	0.0443975	473	C	3.09618e-05	0.087435	29.3954
DP	2015	MLM	Rht	S5A_522153944	5A	522153944	T/C	2.86365e-09	0.0443975	473	C	2.81539e-05	0.0885188	29.5933
BL	2015	MLM	None	S5A_522153953	5A	522153953	A/G	9.29169e-07	0.0398551	276	A	0.0187544	0.116969	29.9646
DP	2015-2018	FarmCPU	Rht_Coleoptile	S5A_522153953	5A	522153953	A/G	4.53574e-07	0.0443975	473	A	0.0183099	0.0986912	14.849
DP	2015-2018	MLM	Rht_Coleoptile	S5A_522153953	5A	522153953	A/G	8.58868e-09	0.0443975	473	A	0.000173354	0.0986912	14.849
DP	2015-2018	MLM	Coleoptile	S5A_522153953	5A	522153953	A/G	2.66866e-09	0.0443975	473	A	5.38641e-05	0.0999976	14.9443
DP	2015-2018	MLM	None	S5A_522153953	5A	522153953	A/G	2.21483e-09	0.0443975	473	A	4.47041e-05	0.100248	14.9624
DP	2015-2018	MLM	Rht	S5A_522153953	5A	522153953	A/G	1.75873e-09	0.0443975	473	A	3.54981e-05	0.101803	15.0869
DP	2015-2017	MLM	Rht_Coleoptile	S5A_522153953	5A	522153953	A/G	2.4314e-08	0.0443975	473	A	0.000490754	0.0792006	17.0832
DP	2015-2017	MLM	Coleoptile	S5A_522153953	5A	522153953	A/G	7.7747e-09	0.0443975	473	A	0.000156925	0.0807038	17.2415
DP	2015-2017	MLM	None	S5A_522153953	5A	522153953	A/G	7.40941e-09	0.0443975	473	A	0.000149551	0.0807118	17.2417
DP	2015-2017	BLINK	Rht	S5A_522153953	5A	522153953	A/G	6.87723e-13	0.0443975	473	A	2.7762e-08	0.0816058	17.3471
DP	2015-2017	MLM	Rht	S5A_522153953	5A	522153953	A/G	6.30647e-09	0.0443975	473	A	0.00012729	0.0816058	17.3471
DP	2015	FarmCPU	Rht_Coleoptile	S5A_522153953	5A	522153953	A/G	1.02693e-07	0.0443975	473	A	0.00414549	0.0861828	29.1894
DP	2015	MLM	Rht_Coleoptile	S5A_522153953	5A	522153953	A/G	9.75234e-09	0.0443975	473	A	8.79196e-05	0.0861828	29.1894
DP	2015	MLM	None	S5A_522153953	5A	522153953	A/G	3.37626e-09	0.0443975	473	A	2.99778e-05	0.0874014	29.3886
DP	2015	MLM	Coleoptile	S5A_522153953	5A	522153953	A/G	3.61564e-09	0.0443975	473	A	3.09618e-05	0.087435	29.3954
DP	2015	MLM	Rht	S5A_522153953	5A	522153953	A/G	2.86365e-09	0.0443975	473	A	2.81539e-05	0.0885188	29.5933
BL	2015	BLINK	None	S5A_523025549	5A	523025549	A/G	4.55672e-11	0.0416667	276	A	1.83946e-06	0.118723	30.8066
BL	2015	MLM	None	S5A_523025549	5A	523025549	A/G	2.5747e-06	0.0416667	276	A	0.0346451	0.118723	30.8066
DP	2015-2018	MLM	None	S5A_523025549	5A	523025549	A/G	1.32904e-06	0.0528541	473	A	0.0107301	0.071354	11.7513
DP	2015-2018	MLM	Coleoptile	S5A_523025549	5A	523025549	A/G	1.32649e-06	0.0528541	473	A	0.0107095	0.0713644	11.7521
DP	2015-2018	MLM	Rht	S5A_523025549	5A	523025549	A/G	1.17513e-06	0.0528541	473	A	0.00948756	0.0725181	11.8524
DP	2015-2018	MLM	Rht_Coleoptile	S5A_523025549	5A	523025549	A/G	1.29573e-06	0.0528541	473	A	0.0104612	0.0745019	12.022
DP	2015-2017	MLM	None	S5A_523025549	5A	523025549	A/G	1.13227e-05	0.0528541	473	A	0.0351595	0.050107	12.6466
DP	2015-2017	MLM	Coleoptile	S5A_523025549	5A	523025549	A/G	1.15229e-05	0.0528541	473	A	0.0357811	0.0501075	12.6466
DP	2015-2017	MLM	Rht	S5A_523025549	5A	523025549	A/G	1.04589e-05	0.0528541	473	A	0.0324773	0.0507241	12.7303
DP	2015-2017	MLM	Rht_Coleoptile	S5A_523025549	5A	523025549	A/G	9.79996e-06	0.0528541	473	A	0.0305126	0.0534074	13.072
DP	2015	MLM	Coleoptile	S5A_523025549	5A	523025549	A/G	1.03446e-06	0.0528541	473	A	0.00278394	0.0627314	23.1779
DP	2015	MLM	None	S5A_523025549	5A	523025549	A/G	1.00385e-06	0.0528541	473	A	0.00270155	0.0627325	23.1781
DP	2015	MLM	Rht	S5A_523025549	5A	523025549	A/G	9.23154e-07	0.0528541	473	A	0.00248439	0.0635695	23.3434
DP	2015	MLM	Rht_Coleoptile	S5A_523025549	5A	523025549	A/G	9.74574e-07	0.0528541	473	A	0.00262277	0.0657296	23.7536
DP	2015-2018	MLM	None	S5A_523147137	5A	523147137	G/A	9.47173e-06	0.0422833	473	G	0.0224915	0.0700604	14.2957
DP	2015-2018	MLM	Rht	S5A_523147137	5A	523147137	G/A	7.79839e-06	0.0422833	473	G	0.0196753	0.0711225	14.4095
DP	2015-2018	MLM	Coleoptile	S5A_523147137	5A	523147137	G/A	7.30796e-06	0.0422833	473	G	0.018438	0.0711854	14.4217
DP	2015-2018	MLM	Rht_Coleoptile	S5A_523147137	5A	523147137	G/A	2.94255e-06	0.0422833	473	G	0.0197975	0.0763224	14.9774
DP	2015-2017	MLM	None	S5A_523147137	5A	523147137	G/A	2.15549e-05	0.0422833	473	G	0.0457962	0.0535421	16.0496
DP	2015-2017	MLM	Coleoptile	S5A_523147137	5A	523147137	G/A	2.09662e-05	0.0422833	473	G	0.0445455	0.053683	16.0838
DP	2015-2017	MLM	Rht	S5A_523147137	5A	523147137	G/A	1.88534e-05	0.0422833	473	G	0.0400566	0.0541304	16.1441
DP	2015-2017	MLM	Rht_Coleoptile	S5A_523147137	5A	523147137	G/A	7.08388e-06	0.0422833	473	G	0.0259965	0.0592492	16.9472
DP	2015	MLM	None	S5A_523147137	5A	523147137	G/A	1.3675e-05	0.0422833	473	G	0.0262872	0.0595243	27.7186
DP	2015	MLM	Coleoptile	S5A_523147137	5A	523147137	G/A	1.33243e-05	0.0422833	473	G	0.025613	0.059517	27.7395
DP	2015	MLM	Rht	S5A_523147137	5A	523147137	G/A	1.17984e-05	0.0422833	473	G	0.0226799	0.0602734	27.9039
DP	2015	MLM	Rht_Coleoptile	S5A_523147137	5A	523147137	G/A	5.95888e-06	0.0422833	473	G	0.0126604	0.0642882	28.9155
DP	2015-2018	MLM	Coleoptile	S5A_523760201	5A	523760201	T/C	2.4014e-05	0.442918	473	C	0.0484699	0.0520386	7.74098
DP	2015-2018	MLM	Rht	S5A_523760201	5A	523760201	T/C	1.60747e-05	0.442918	473	C	0.0360502	0.0568147	8.17293
DP	2015-2019	FarmCPU	Rht	S5A_535147597	5A	535147597	T/C	2.76756e-06	0.350951	473	T	0.0187252	0.0174998	3.20974
DP	2015	BLINK	None	S5A_535147597	5A	535147597	T/C	2.83633e-10	0.350951	473	T	5.72484e-06	0.060338	11.9957
DP	2015	MLM	None	S5A_535147597	5A	535147597	T/C	2.30399e-06	0.350951	473	T	0.00581296	0.060338	11.9957
DP	2015	BLINK	Coleoptile	S5A_535147597	5A	535147597	T/C	2.9387e-10	0.350951	473	T	5.93146e-06	0.0604192	12.0064
DP	2015	MLM	Coleoptile	S5A_535147597	5A	535147597	T/C	2.45454e-06	0.350951	473	T	0.00619279	0.0604192	12.0064
DP	2015	MLM	Rht	S5A_535147597	5A	535147597	T/C	2.24339e-06	0.350951	473	T	0.00566007	0.0606937	12.0321
DP	2015	BLINK	Rht_Coleoptile	S5A_535147597	5A	535147597	T/C	2.11138e-09	0.350951	473	T	8.5232e-05	0.0624215	12.2107
DP	2015	FarmCPU	Rht_Coleoptile	S5A_535147597	5A	535147597	T/C	2.02669e-06	0.350951	473	T	0.0204533	0.0624215	12.2107
DP	2015	MLM	Rht_Coleoptile	S5A_535147597	5A	535147597	T/C	1.22877e-06	0.350951	473	T	0.0031002	0.0624215	12.2107
DP	2015	MLM	Rht	S5A_537252134	5A	537252134	C/G	3.0907e-05	0.488372	473	C	0.0499061	0.0226212	7.46281
DP	2015	FarmCPU	None	S5A_537252134	5A	537252134	C/G	2.41039e-07	0.488372	473	C	0.00324341	0.0241278	7.65073
DP	2015	MLM	None	S5A_537252134	5A	537252134	C/G	2.24802e-05	0.488372	473	C	0.0370457	0.0241278	7.65073
DP	2015	FarmCPU	Coleoptile	S5A_537252134	5A	537252134	C/G	2.32257e-07	0.488372	473	C	0.00312525	0.0242176	7.66985
DP	2015	MLM	Coleoptile	S5A_537252134	5A	537252134	C/G	2.36033e-05	0.488372	473	C	0.0384279	0.0242176	7.66985
DP	2015-2019	FarmCPU	Rht_Coleoptile	S5A_55384623	5A	55384623	C/T	3.02105e-06	0.0613108	473	T	0.0203256	0.000207463	0.653502
DP	2015-2018	MLM	Coleoptile	S5A_567120912	5A	567120912	G/A	1.9401e-05	0.0665962	473	G	0.0435101	0.0503451	8.80651
DP	2015-2018	MLM	Rht_Coleoptile	S5A_567120912	5A	567120912	G/A	1.16867e-05	0.0665962	473	G	0.0314513	0.0547505	9.21252
DP	2015-2019	FarmCPU	Coleoptile	S5A_698370154	5A	698370154	C/T	3.40627e-06	0.0465116	473	T	0.0155403	0.018436	8.89015
DP	2015-2019	FarmCPU	None	S5A_698370154	5A	698370154	C/T	1.25338e-06	0.0465116	473	T	0.0101193	0.0185409	8.91004
DP	2018	FarmCPU	Rht	S5A_708289985	5A	708289985	T/C	1.51879e-06	0.338266	473	T	0.0180178	0.00244222	1.76272
DP	2018	FarmCPU	None	S5A_708289985	5A	708289985	T/C	1.37604e-06	0.338266	473	T	0.0175097	0.00285784	1.9027
DP	2018	FarmCPU	Rht_Coleoptile	S5A_708289985	5A	708289985	T/C	3.22357e-06	0.338266	473	T	0.0286856	0.00346734	2.1002
DP	2018	FarmCPU	Coleoptile	S5A_708289985	5A	708289985	T/C	4.13556e-07	0.338266	473	T	0.0041736	0.00349255	2.10769
DP	2015-2019	FarmCPU	None	S5B_38519185	5B	38519185	G/C	2.48789e-07	0.298097	473	C	0.00876925	0.0305877	3.9336
DP	2015-2017	FarmCPU	None	S5B_491273019	5B	491273019	G/T	6.30933e-08	0.410148	473	T	0.000929155	0.0487597	13.4791
DP	2015-2017	MLM	None	S5B_491273019	5B	491273019	G/T	2.03304e-05	0.410148	473	T	0.0455943	0.0487597	13.4791
DP	2015-2017	FarmCPU	Coleoptile	S5B_491273019	5B	491273019	G/T	6.47559e-08	0.410148	473	T	0.000963137	0.0487918	13.4853
DP	2015-2017	MLM	Coleoptile	S5B_491273019	5B	491273019	G/T	2.00216e-05	0.410148	473	T	0.0445455	0.0487918	13.4853
DP	2015-2017	FarmCPU	Rht	S5B_491273019	5B	491273019	G/T	8.23758e-08	0.410148	473	T	0.00152195	0.0490449	13.5201
DP	2015-2017	MLM	Rht	S5B_491273019	5B	491273019	G/T	1.7879e-05	0.410148	473	T	0.0400566	0.0490449	13.5201
DP	2015	MLM	Coleoptile	S5B_491273019	5B	491273019	G/T	1.69183e-05	0.410148	473	T	0.0306985	0.0572883	23.9346
DP	2015	MLM	None	S5B_491273019	5B	491273019	G/T	1.71166e-05	0.410148	473	T	0.0300418	0.0573141	23.937
DP	2015	MLM	Rht	S5B_491273019	5B	491273019	G/T	1.48632e-05	0.410148	473	T	0.026509	0.0576897	24.0181
BL	2015	BLINK	None	S5B_564205236	5B	564205236	T/C	7.76643e-10	0.0271739	276	T	1.04505e-05	0.0583278	29.7589
BL	2015	FarmCPU	None	S5B_564205236	5B	564205236	T/C	1.00131e-10	0.0271739	276	T	4.04209e-06	0.0583278	29.7589
DP	2018	FarmCPU	Rht	S5B_688707978	5B	688707978	C/T	1.78536e-06	0.143763	473	C	0.0180178	0.0366541	11.0383
DP	2018	FarmCPU	None	S5B_688707978	5B	688707978	C/T	1.73501e-06	0.143763	473	C	0.0175097	0.0375184	11.1597
DP	2018	FarmCPU	Rht_Coleoptile	S5B_688707978	5B	688707978	C/T	4.35403e-07	0.143763	473	C	0.00585879	0.0386647	11.3382
DP	2018	FarmCPU	Coleoptile	S5B_688707978	5B	688707978	C/T	2.0598e-08	0.143763	473	C	0.000277167	0.0387906	11.3547
DP	2018	FarmCPU	Rht	S5B_712437309	5B	712437309	G/A	3.09347e-07	0.252643	473	G	0.00929641	0.063875	15.8178
DP	2018	FarmCPU	Coleoptile	S5B_712437309	5B	712437309	G/A	2.47054e-10	0.252643	473	G	9.90849e-06	0.066241	15.9146
DP	2018	FarmCPU	Rht_Coleoptile	S5B_712437309	5B	712437309	G/A	5.08925e-09	0.252643	473	G	0.000102721	0.0663959	15.9348
DP	2018	FarmCPU	None	S5B_712437309	5B	712437309	G/A	2.5778e-07	0.252643	473	G	0.00898785	0.0673385	16.0407
DP	2015	FarmCPU	Coleoptile	S5D_424319010	5D	424319010	A/G	6.04414e-07	0.0792812	473	G	0.00509833	0.0417056	21.3887
DP	2015	FarmCPU	None	S5D_424319010	5D	424319010	A/G	5.77974e-07	0.0792812	473	G	0.00575817	0.0417337	21.3891
DP	2015-2019	FarmCPU	None	S5D_431971681	5D	431971681	T/G	1.09144e-06	0.230444	473	G	0.0101193	0.0157384	4.41971
DP	2015-2019	FarmCPU	Rht_Coleoptile	S5D_431971681	5D	431971681	T/G	1.5995e-06	0.230444	473	G	0.0129137	0.0159354	4.45618
DP	2015-2019	FarmCPU	Coleoptile	S5D_431971681	5D	431971681	T/G	2.3328e-06	0.230444	473	G	0.0155403	0.0160151	4.46724
BL	2015	FarmCPU	None	S6A_3238494	6A	3238494	T/C	6.33897e-06	0.365942	276	T	0.0319865	0.0404074	7.62228
DP	2015	FarmCPU	None	S6A_595578858	6A	595578858	A/C	1.65323e-08	0.0602537	473	C	0.000667377	0.0174544	11.5811
DP	2015	FarmCPU	Coleoptile	S6A_595578858	6A	595578858	A/C	1.51387e-08	0.0602537	473	C	0.000611117	0.0174918	11.5961
DP	2018	FarmCPU	Coleoptile	S6B_198974721	6B	198974721	G/C	4.25519e-06	0.0591966	473	G	0.0286289	0.0062486	5.14092
DP	2015-2017	BLINK	Rht_Coleoptile	S6B_313149333	6B	313149333	G/A	1.56484e-07	0.428118	473	A	0.00315847	0.0445577	6.25259
DP	2015-2017	FarmCPU	Rht_Coleoptile	S6B_422353914	6B	422353914	G/A	3.21691e-06	0.204017	473	A	0.0454482	0.0104452	4.68451
BL	2015	BLINK	None	S6B_567777220	6B	567777220	G/C	3.5187e-09	0.425725	276	G	2.84086e-05	0.0850976	10.8265
BL	2015	FarmCPU	None	S6B_567777220	6B	567777220	G/C	2.06851e-09	0.425725	276	G	4.17509e-05	0.0850976	10.8265
DP	2015-2019	FarmCPU	Coleoptile	S6B_646439562	6B	646439562	C/G	3.84963e-06	0.292812	473	C	0.0155403	0.0342198	4.23301
DP	2015-2019	FarmCPU	None	S6B_646439562	6B	646439562	C/G	1.761e-06	0.292812	473	C	0.0117059	0.034296	4.23708
DP	2015-2018	FarmCPU	None	S6B_658652657	6B	658652657	C/T	8.13228e-06	0.190275	473	C	0.0468977	0.0426449	5.33634
DP	2015-2017	FarmCPU	Coleoptile	S6B_669882558	6B	669882558	A/C	4.74827e-06	0.227273	473	A	0.0273826	0.00552299	2.57341
DP	2015-2017	FarmCPU	None	S6B_669882558	6B	669882558	A/C	4.65246e-06	0.227273	473	A	0.0268301	0.00553025	2.57426
BL	2015	FarmCPU	None	S6B_710149895	6B	710149895	G/A	4.77682e-06	0.461957	276	A	0.0275472	0.00650634	3.19819
DP	2019	BLINK	Rht	S6B_715854351	6B	715854351	G/T	3.29545e-10	0.0338266	473	T	1.33031e-05	0.0473559	39.3306
DP	2015-2019	FarmCPU	Coleoptile	S6D_450973138	6D	450973138	C/T	3.84965e-06	0.0539112	473	T	0.0155403	0.00622451	4.76827
DP	2015-2019	FarmCPU	Rht	S6D_450973138	6D	450973138	C/T	4.61467e-06	0.0539112	473	T	0.0266121	0.00630617	4.79338
DP	2015	FarmCPU	Rht_Coleoptile	S6D_460859615	6D	460859615	G/A	1.30806e-06	0.471459	473	G	0.0176013	0.0122533	5.07908
DP	2015	FarmCPU	None	S6D_460859615	6D	460859615	G/A	4.62039e-06	0.471459	473	G	0.020724	0.0130488	5.23303
DP	2015	FarmCPU	Coleoptile	S6D_460859615	6D	460859615	G/A	4.31352e-06	0.471459	473	G	0.0195222	0.0131289	5.25432
DP	2019	BLINK	Rht	S7A_200608115	7A	200608115	G/A	8.48849e-10	0.0422833	473	G	1.71332e-05	0.0361324	42.5409
DP	2015	FarmCPU	Coleoptile	S7A_39140977	7A	39140977	C/G	4.35246e-06	0.141649	473	G	0.0195222	0.00244438	3.52497
DP	2015	FarmCPU	None	S7A_39140977	7A	39140977	C/G	3.79175e-06	0.141649	473	G	0.0191332	0.00246273	3.53475
DP	2015	BLINK	Rht_Coleoptile	S7A_39140977	7A	39140977	C/G	1.51415e-07	0.141649	473	G	0.00278842	0.0040128	4.54773
DP	2015-2018	BLINK	Rht	S7A_82946533	7A	82946533	C/T	7.76096e-08	0.19556	473	T	0.00156647	0.0346278	4.73541
DP	2015-2018	BLINK	Coleoptile	S7A_82946533	7A	82946533	C/T	9.735e-08	0.19556	473	T	0.00196491	0.035821	4.80199
DP	2015-2018	BLINK	None	S7A_82946533	7A	82946533	C/T	4.68634e-08	0.19556	473	T	0.000985239	0.0365861	4.84759
DP	2015-2017	FarmCPU	None	S7A_82946533	7A	82946533	C/T	3.78208e-06	0.19556	473	T	0.0254458	0.0257261	5.22039
DP	2015-2017	FarmCPU	Coleoptile	S7A_82946533	7A	82946533	C/T	4.14853e-06	0.19556	473	T	0.0273826	0.0257402	5.22764
DP	2015-2019	FarmCPU	None	S7B_109677520	7B	109677520	C/T	2.02986e-06	0.389006	473	C	0.0117059	0.00211039	1.79813
DP	2015-2019	FarmCPU	Coleoptile	S7B_109677520	7B	109677520	C/T	8.25209e-08	0.389006	473	C	0.0033312	0.00213882	1.81064
DP	2015-2019	FarmCPU	Rht	S7B_109677520	7B	109677520	C/T	5.51806e-07	0.389006	473	C	0.0111377	0.00252678	1.96909
DP	2015-2019	FarmCPU	Rht	S7B_33921423	7B	33921423	T/C	1.51883e-06	0.443975	473	C	0.0187252	0.0309918	5.00752
DP	2018	FarmCPU	Rht_Coleoptile	S7B_636429099	7B	636429099	A/G	1.37121e-09	0.303383	473	A	5.53531e-05	0.0678788	9.7387
DP	2018	FarmCPU	Coleoptile	S7B_636429099	7B	636429099	A/G	4.90908e-10	0.303383	473	A	9.90849e-06	0.0682488	9.74379
DP	2015-2017	MLM	Rht	S7B_663828256	7B	663828256	C/T	1.80656e-05	0.250529	473	T	0.0400566	0.0349938	7.0532
DP	2015-2017	FarmCPU	Rht_Coleoptile	S7B_663828256	7B	663828256	C/T	3.43515e-06	0.250529	473	T	0.0454482	0.0360038	7.12384
DP	2015-2017	MLM	Rht_Coleoptile	S7B_663828256	7B	663828256	C/T	1.28496e-05	0.250529	473	T	0.0305126	0.0360038	7.12384
DP	2015-2017	FarmCPU	Coleoptile	S7B_663828256	7B	663828256	C/T	7.15768e-08	0.250529	473	T	0.000963137	0.0361122	7.13454
DP	2015-2017	MLM	Coleoptile	S7B_663828256	7B	663828256	C/T	1.45833e-05	0.250529	473	T	0.0367935	0.0361122	7.13454
DP	2015-2017	FarmCPU	None	S7B_663828256	7B	663828256	C/T	6.90514e-08	0.250529	473	T	0.000929155	0.0361196	7.13489
DP	2015-2017	MLM	None	S7B_663828256	7B	663828256	C/T	1.41418e-05	0.250529	473	T	0.0356798	0.0361196	7.13489
DP	2015-2017	MLM	Rht	S7B_663828309	7B	663828309	A/T	1.80656e-05	0.250529	473	T	0.0400566	0.0349938	7.0532
DP	2015-2017	MLM	Rht_Coleoptile	S7B_663828309	7B	663828309	A/T	1.28496e-05	0.250529	473	T	0.0305126	0.0360038	7.12384
DP	2015-2017	MLM	Coleoptile	S7B_663828309	7B	663828309	A/T	1.45833e-05	0.250529	473	T	0.0367935	0.0361122	7.13454
DP	2015-2017	MLM	None	S7B_663828309	7B	663828309	A/T	1.41418e-05	0.250529	473	T	0.0356798	0.0361196	7.13489
DP	2015-2017	FarmCPU	Rht	S7B_663828323	7B	663828323	T/G	1.13106e-07	0.250529	473	G	0.00152195	0.0349938	7.0532
DP	2015-2017	MLM	Rht	S7B_663828323	7B	663828323	T/G	1.80656e-05	0.250529	473	G	0.0400566	0.0349938	7.0532
DP	2015-2017	MLM	Rht_Coleoptile	S7B_663828323	7B	663828323	T/G	1.28496e-05	0.250529	473	G	0.0305126	0.0360038	7.12384
DP	2015-2017	MLM	Coleoptile	S7B_663828323	7B	663828323	T/G	1.45833e-05	0.250529	473	G	0.0367935	0.0361122	7.13454
DP	2015-2017	MLM	None	S7B_663828323	7B	663828323	T/G	1.41418e-05	0.250529	473	G	0.0356798	0.0361196	7.13489
DP	2015	FarmCPU	Coleoptile	S7B_665706657	7B	665706657	C/A	7.47089e-06	0.411205	473	C	0.0301585	0.0199615	10.0894
DP	2015	FarmCPU	None	S7B_665706657	7B	665706657	C/A	7.33053e-06	0.411205	473	C	0.0295919	0.0199705	10.0914
DP	2015	FarmCPU	Rht	S7D_104575972	7D	104575972	G/C	1.06136e-06	0.107822	473	C	0.0428449	0.0141193	12.3304
DP	2015	FarmCPU	None	S7D_104575972	7D	104575972	G/C	7.13209e-07	0.107822	473	C	0.00575817	0.0149212	12.6418
DP	2015	FarmCPU	Coleoptile	S7D_104575972	7D	104575972	G/C	6.31481e-07	0.107822	473	C	0.00509833	0.0149809	12.6741
DP	2015-2019	FarmCPU	Coleoptile	S7D_2880806	7D	2880806	C/T	9.43814e-06	0.15222	473	T	0.0317499	0.0121425	4.32733
DP	2015-2019	FarmCPU	None	S7D_2880806	7D	2880806	C/T	1.13217e-05	0.15222	473	T	0.0380863	0.0122181	4.33898
DP	2015-2017	FarmCPU	Rht	SUN_30130492	UN	30130492	A/C	3.37501e-06	0.377378	473	A	0.0227071	0.0223474	6.15711
DP	2015-2017	FarmCPU	Rht_Coleoptile	SUN_30130492	UN	30130492	A/C	1.85055e-06	0.377378	473	A	0.0454482	0.024857	6.49882
DP	2017	BLINK	Rht_Coleoptile	SUN_30130534	UN	30130534	T/G	1.80063e-07	0.377378	473	T	0.0036344	0.0373344	7.1577
DP	2015-2018	FarmCPU	None	SUN_30130578	UN	30130578	C/G	4.81335e-07	0.353066	473	C	0.0194305	0.013992	3.19283
BL	2015	BLINK	None	SUN_84017696	UN	84017696	G/C	6.21695e-08	0.190217	276	G	0.000418277	0.0982422	14.0297
BL	2015	FarmCPU	None	SUN_84017696	UN	84017696	G/C	7.84064e-07	0.190217	276	G	0.00634908	0.0982422	14.0297
