# Supplementary material for: Comparison of Single-Trait and Multi-Trait Genome-Wide Association Models and Inclusion of Correlated Traits in the Dissection of the Genetic Architecture of a Complex Trait in a Breeding Program
Source: Front Plant Sci. 2022 Jan 28;12:772907. doi: 10.3389/fpls.2021.772907 (PMC8831792; doi:10.3389/fpls.2021.772907)
Supplement: Supplementary file 3 [file Data_Sheet_3.xlsx]

## Sheet: MT-BON
Population	Year	Model	Trait	Marker	Chromosome	Position	Alleles	MAF	nobs	P.value	Favorable Allele (Emergence)	R2 (Emergence)	Effect % (Emergence)	Favorable Allele (Coleoptile Length)	R2 (Coleoptile Length)	Effect mm (Coleoptile Length)
DP	2015	MTMM	CL	S1A_14084576	1A	14084576	T/A	0.00845666	473	2.15727e-08	T	5.34547e-05	2.17916	A	0.0671658	14.5193
DP	2017	MTMM	CL	S1A_14084576	1A	14084576	T/A	0.00105708	473	1.00247e-06	A	0.00105959	5.3231	A	0.0671658	14.5193
DP	2018	MTMM	CL	S1A_14084576	1A	14084576	T/A	0.00845666	473	3.53806e-08	T	4.84901e-06	0.486339	A	0.0671658	14.5193
DP	2019	MTMM	CL	S1A_14084576	1A	14084576	T/A	0.00105708	473	7.84901e-07	T	0.000771767	9.82567	A	0.0671658	14.5193
DP	2015-2017	MTMM	CL	S1A_14084576	1A	14084576	T/A	0.00845666	473	6.56719e-09	A	6.8155e-05	1.50223	A	0.0671658	14.5193
DP	2015-2018	MTMM	CL	S1A_14084576	1A	14084576	T/A	0.00105708	473	6.56535e-07	A	3.38239e-05	0.824047	A	0.0671658	14.5193
DP	2015-2019	MTMM	CL	S1A_14084576	1A	14084576	T/A	0.00845666	473	3.55305e-08	T	0.0001483	1.80322	A	0.0671658	14.5193
DP	2015	MTMM	FULL	S1A_38715697	1A	38715697	G/C	0.00845666	473	1.7379e-08	G	0.0467806	13.7863	G	0.0467806	13.7863
DP	2015-2019	MTMM	COM	S1A_469500178	1A	469500178	G/T	0.00105708	473	1.08259e-06	G	0.0168361	10.1233	G	0.0168361	10.1233
DP	2019	MTMM	FULL	S1A_535882220	1A	535882220	C/T	0.00845666	473	1.05307e-08	C	0.0340955	11.8889	C	0.0340955	11.8889
DP	2015-2017	MTMM	COM	S1D_374470611	1D	374470611	C/A	0.00105708	473	9.09055e-07	C	0.0232397	12.9943	C	0.0232397	12.9943
DP	2015-2017	MTMM	FULL	S1D_374470611	1D	374470611	C/A	0.00845666	473	1.28122e-08	C	0.0232397	12.9943	C	0.0232397	12.9943
DP	2015-2017	MTMM	COM	S2A_605310547	2A	605310547	G/T	0.00105708	473	1.01927e-06	G	0.0375548	5.45053	G	0.0375548	5.45053
DP	2015-2017	MTMM	FULL	S2A_605310547	2A	605310547	G/T	0.339323	473	1.22873e-08	G	0.0375548	5.45053	G	0.0375548	5.45053
DP	2015-2017	MTMM	FULL	S2A_706756678	2A	706756678	T/C	0.307611	473	9.89256e-08	T	0.0154784	3.70718	T	0.0154784	3.70717
DP	2015-2019	MTMM	FULL	S2B_236592800	2B	236592800	C/T	0.284355	473	2.42011e-07	T	0.0423806	5.52976	T	0.0423806	5.52975
DP	2015-2019	MTMM	COM	S2B_244937325	2B	244937325	C/G	0.412262	473	3.06432e-07	C	0.0555154	5.63305	C	0.0555154	5.63305
DP	2015-2019	MTMM	FULL	S2B_244937325	2B	244937325	C/G	0.400634	473	1.77157e-07	C	0.0555154	5.63305	C	0.0555154	5.63305
DP	2015-2019	MTMM	COM	S2B_245172701	2B	245172701	C/T	0.404863	473	2.64633e-07	C	0.0537102	5.47758	C	0.0537102	5.47758
DP	2015-2019	MTMM	FULL	S2B_245172701	2B	245172701	C/T	0.0972516	473	9.73805e-12	C	0.0537102	5.47758	C	0.0537102	5.47758
DP	2015-2019	MTMM	COM	S2B_249191773	2B	249191773	G/A	0.11945	473	1.37518e-09	G	0.049761	5.37024	G	0.049761	5.37024
DP	2015-2019	MTMM	FULL	S2B_249191773	2B	249191773	G/A	0.11945	473	1.37518e-09	G	0.049761	5.37024	G	0.049761	5.37024
DP	2015-2017	MTMM	COM	S2B_301162652	2B	301162652	T/G	0.10148	473	2.87874e-09	T	0.026878	4.58503	G	0.000853707	0.251583
DP	2015-2018	MTMM	COM	S2B_301162652	2B	301162652	T/G	0.117336	473	1.95693e-12	T	0.037334	4.20774	G	0.000853707	0.251583
DP	2015-2019	MTMM	COM	S2B_301162652	2B	301162652	T/G	0.115222	473	6.11422e-13	T	0.0492417	5.0501	T	0.026878	4.58503
DP	2015-2018	MTMM	EM	S2B_301162652	2B	301162652	T/G	0.121564	473	2.51098e-12	T	0.037334	4.20774	T	0.037334	4.20774
DP	2015-2019	MTMM	EM	S2B_301162652	2B	301162652	T/G	0.105708	473	2.64075e-15	T	0.0492417	5.0501	T	0.0492417	5.0501
DP	2015-2017	MTMM	FULL	S2B_301162652	2B	301162652	T/G	0.116279	473	8.67325e-14	T	0.026878	4.58503	T	0.026878	4.58503
DP	2015-2018	MTMM	FULL	S2B_301162652	2B	301162652	T/G	0.116279	473	8.67325e-14	T	0.037334	4.20774	T	0.037334	4.20774
DP	2015-2019	MTMM	FULL	S2B_301162652	2B	301162652	T/G	0.112051	473	4.85026e-15	T	0.0492417	5.0501	T	0.0492417	5.0501
DP	2015	MTMM	COM	S2B_789673174	2B	789673174	A/G	0.112051	473	4.85026e-15	G	0.0257511	9.31175	G	0.0257511	9.31175
DP	2015	MTMM	FULL	S2B_789673174	2B	789673174	A/G	0.209302	473	1.94522e-08	G	0.0257511	9.31175	G	0.0226266	5.32887
DP	2015-2017	MTMM	FULL	S2B_789673174	2B	789673174	A/G	0.114165	473	1.89168e-12	G	0.0226266	5.32887	G	0.0257511	9.31175
DP	2015	MTMM	COM	S2B_789673192	2B	789673192	T/C	0.472516	473	2.72336e-07	C	0.0202594	8.74635	C	0.0202594	8.74634
DP	2015	MTMM	FULL	S2B_789673192	2B	789673192	T/C	0.107822	473	4.22788e-13	C	0.0202594	8.74635	C	0.0193361	5.21663
DP	2015-2017	MTMM	FULL	S2B_789673192	2B	789673192	T/C	0.102537	473	5.96153e-12	C	0.0193361	5.21663	C	0.0202594	8.74634
DP	2018	MTMM	COM	S4A_494037299	4A	494037299	C/T	0.141649	473	9.15358e-07	C	0.0232747	8.33814	C	0.0232747	8.33814
DP	2018	MTMM	FULL	S4A_494037299	4A	494037299	C/T	0.0443975	473	2.17818e-15	C	0.0232747	8.33814	C	0.0232747	8.33814
DP	2018	MTMM	COM	S4D_506349417	4D	506349417	C/A	0.0443975	473	2.17818e-15	A	0.0349376	14.4619	A	0.0349376	14.4619
DP	2018	MTMM	FULL	S4D_506349417	4D	506349417	C/A	0.0528541	473	7.85443e-11	A	0.0349376	14.4619	A	0.0349376	14.4619
DP	2018	MTMM	COM	S4D_506383558	4D	506383558	T/C	0.0422833	473	5.77182e-09	C	0.0406111	15.3831	C	0.0406111	15.3831
DP	2015-2019	MTMM	COM	S5A_20188656	5A	20188656	G/A	0.442918	473	1.60842e-07	A	0.023916	3.58275	A	0.023916	3.58275
DP	2015-2019	MTMM	COM	S5A_20846922	5A	20846922	T/C	0.350951	473	4.60329e-09	T	0.0286512	4.12885	T	0.0286512	4.12885
DP	2015-2019	MTMM	FULL	S5A_20846922	5A	20846922	T/C	0.488372	473	7.01197e-08	T	0.0286512	4.12885	T	0.0286512	4.12885
DP	2015-2019	MTMM	COM	S5A_20994201	5A	20994201	G/A	0.410148	473	1.11299e-08	G	0.0274473	4.18341	G	0.0274473	4.18341
DP	2015-2019	MTMM	FULL	S5A_20994201	5A	20994201	G/A	0.250529	473	2.4038e-07	G	0.0274473	4.18341	G	0.0274473	4.18341
DP	2015-2019	MTMM	COM	S5A_20994259	5A	20994259	C/T	0.250529	473	2.4038e-07	C	0.0274473	4.18341	C	0.0274473	4.18341
DP	2015-2019	MTMM	FULL	S5A_20994259	5A	20994259	C/T	0.250529	473	2.4038e-07	C	0.0274473	4.18341	C	0.0274473	4.18341
DP	2015-2019	MTMM	COM	S5A_22606162	5A	22606162	C/A	0.250529	473	4.27601e-07	C	0.0218252	3.6765	C	0.0218252	3.6765
DP	2015-2019	MTMM	COM	S5A_27235188	5A	27235188	G/A	0.250529	473	4.27601e-07	G	0.026116	4.2472	G	0.026116	4.2472
DP	2015-2019	MTMM	FULL	S5A_27235188	5A	27235188	G/A	0.250529	473	4.27601e-07	G	0.026116	4.2472	G	0.026116	4.2472
DP	2015-2019	MTMM	COM	S5A_27509872	5A	27509872	G/A	0.320296	473	2.67326e-07	G	0.0224768	3.98434	G	0.0224768	3.98434
DP	2015-2019	MTMM	FULL	S5A_27509872	5A	27509872	G/A	0.0486258	473	2.15695e-07	G	0.0224768	3.98434	G	0.0224768	3.98434
DP	2015-2019	MTMM	COM	S5A_27916538	5A	27916538	G/A	0.0539112	473	3.33735e-07	G	0.0225952	3.95067	G	0.0225952	3.95067
DP	2015-2019	MTMM	FULL	S5A_27916538	5A	27916538	G/A	0.0391121	473	6.54303e-07	G	0.0225952	3.95067	G	0.0225952	3.95067
DP	2015-2019	MTMM	COM	S5A_28286256	5A	28286256	T/C	0.0528541	473	8.35197e-07	T	0.024462	4.21583	T	0.024462	4.21583
DP	2015-2019	MTMM	FULL	S5A_28286256	5A	28286256	T/C	0.0528541	473	8.35197e-07	T	0.024462	4.21583	T	0.024462	4.21583
DP	2019	MTMM	FULL	S5A_34107500	5A	34107500	C/T	0.0338266	473	3.6031e-08	C	0.0310772	15.7881	C	0.0310772	15.7881
DP	2015-2018	MTMM	COM	S5A_463766599	5A	463766599	A/G	0.0475687	473	4.45555e-08	A	0.0495676	7.16224	A	0.0495676	7.16224
DP	2015-2018	MTMM	FULL	S5A_463766599	5A	463766599	A/G	0.0369979	473	6.0924e-07	A	0.0495676	7.16224	A	0.0495676	7.16224
DP	2015-2018	MTMM	COM	S5A_466575972	5A	466575972	C/T	0.404863	473	1.49352e-07	C	0.0501819	7.42564	C	0.0501819	7.42564
DP	2015-2018	MTMM	FULL	S5A_466575972	5A	466575972	C/T	0.489429	473	4.50198e-08	C	0.0501819	7.42564	C	0.0501819	7.42564
DP	2015-2018	MTMM	COM	S5A_471467164	5A	471467164	C/T	0.284355	473	8.6858e-07	C	0.0363668	6.75026	C	0.0363668	6.75026
DP	2015-2018	MTMM	FULL	S5A_471467164	5A	471467164	C/T	0.0972516	473	8.11386e-08	C	0.0363668	6.75026	C	0.0363668	6.75026
DP	2015-2018	MTMM	COM	S5A_473306956	5A	473306956	A/G	0.117336	473	2.02185e-09	A	0.0585393	7.26531	A	0.0585393	7.26531
DP	2015-2018	MTMM	FULL	S5A_473306956	5A	473306956	A/G	0.115222	473	1.94166e-09	A	0.0585393	7.26531	A	0.0585393	7.26531
DP	2015-2018	MTMM	COM	S5A_473308494	5A	473308494	T/C	0.121564	473	3.77128e-09	T	0.057475	7.20715	T	0.057475	7.20715
DP	2015-2018	MTMM	FULL	S5A_473308494	5A	473308494	T/C	0.105708	473	2.74289e-10	T	0.057475	7.20715	T	0.057475	7.20715
DP	2015-2018	MTMM	COM	S5A_473321220	5A	473321220	T/C	0.116279	473	1.83932e-10	T	0.0611476	7.62102	T	0.0611476	7.62102
DP	2015-2018	MTMM	FULL	S5A_473321220	5A	473321220	T/C	0.116279	473	1.83932e-10	T	0.0611476	7.62102	T	0.0611476	7.62102
DP	2015-2018	MTMM	COM	S5A_473407357	5A	473407357	G/A	0.112051	473	3.78767e-12	G	0.0600383	7.57282	G	0.0369532	7.62987
DP	2015-2017	MTMM	FULL	S5A_473407357	5A	473407357	G/A	0.112051	473	3.78767e-12	G	0.0369532	7.62987	G	0.0600383	7.57282
DP	2015-2018	MTMM	FULL	S5A_473407357	5A	473407357	G/A	0.114165	473	8.52482e-09	G	0.0600383	7.57282	G	0.0600383	7.57282
DP	2015-2018	MTMM	COM	S5A_473644518	5A	473644518	C/T	0.107822	473	3.92919e-09	C	0.0627647	7.29145	C	0.0627647	7.29145
DP	2015-2018	MTMM	FULL	S5A_473644518	5A	473644518	C/T	0.102537	473	3.10986e-08	C	0.0627647	7.29145	C	0.0627647	7.29145
DP	2015	MTMM	COM	S5A_503231244	5A	503231244	T/C	0.0443975	473	9.0925e-15	C	0.024017	11.0703	C	0.024017	11.0703
DP	2015-2017	MTMM	COM	S5A_503231244	5A	503231244	T/C	0.0443975	473	9.0925e-15	C	0.0226269	6.56001	C	0.031863	6.0616
DP	2015-2018	MTMM	COM	S5A_503231244	5A	503231244	T/C	0.0528541	473	5.17634e-09	C	0.031863	6.0616	C	0.024017	11.0703
DP	2015	MTMM	FULL	S5A_503231244	5A	503231244	T/C	0.0422833	473	6.21588e-09	C	0.024017	11.0703	C	0.0226269	6.56001
DP	2015-2018	MTMM	FULL	S5A_503231244	5A	503231244	T/C	0.0665962	473	4.51773e-08	C	0.031863	6.0616	C	0.031863	6.0616
DP	2015	MTMM	COM	S5A_503873008	5A	503873008	T/C	0.410148	473	9.98861e-09	T	0.0325416	8.74516	T	0.0325416	8.74516
DP	2015	MTMM	FULL	S5A_503873008	5A	503873008	T/C	0.250529	473	1.0465e-08	T	0.0325416	8.74516	T	0.0325416	8.74516
DP	2015	MTMM	COM	S5A_511959063	5A	511959063	G/A	0.250529	473	1.0465e-08	G	0.0306598	8.44522	G	0.0306598	8.44522
DP	2015	MTMM	FULL	S5A_511959063	5A	511959063	G/A	0.250529	473	1.0465e-08	G	0.0306598	8.44522	G	0.0306598	8.44522
DP	2015	MTMM	COM	S5A_511963647	5A	511963647	G/A	0.489429	473	5.64386e-10	G	0.0294822	8.19462	G	0.0294822	8.19462
DP	2015	MTMM	FULL	S5A_511963647	5A	511963647	G/A	0.0993658	473	2.79936e-07	G	0.0294822	8.19462	G	0.0294822	8.19462
DP	2015	MTMM	COM	S5A_512259045	5A	512259045	G/T	0.0930233	473	1.1566e-07	G	0.0587126	17.1978	G	8.13343e-06	0.0380469
DP	2015-2017	MTMM	COM	S5A_512259045	5A	512259045	G/T	0.0845666	473	1.1149e-06	G	0.0329453	7.86496	G	0.0587126	17.1978
DP	2015-2018	MTMM	COM	S5A_512259045	5A	512259045	G/T	0.114165	473	5.60785e-09	G	0.0135166	3.9227	G	0.0329453	7.86496
DP	2015	MTMM	EM	S5A_512259045	5A	512259045	G/T	0.118393	473	4.08564e-09	G	0.0587126	17.1978	G	0.0587126	17.1978
DP	2015	MTMM	FULL	S5A_512259045	5A	512259045	G/T	0.110994	473	2.6905e-09	G	0.0587126	17.1978	G	0.0329453	7.86496
DP	2015-2017	MTMM	FULL	S5A_512259045	5A	512259045	G/T	0.108879	473	1.98218e-09	G	0.0329453	7.86496	G	0.0135166	3.9227
DP	2015	MTMM	COM	S5A_512394193	5A	512394193	T/G	0.11945	473	2.59847e-09	T	0.0509779	14.1175	T	0.0509779	14.1175
DP	2015	MTMM	FULL	S5A_512394193	5A	512394193	T/G	0.284355	473	4.91477e-08	T	0.0509779	14.1175	T	0.0509779	14.1175
DP	2015	MTMM	COM	S5A_512394234	5A	512394234	C/T	0.0972516	473	8.4652e-07	C	0.0509779	14.1175	C	0.0509779	14.1175
DP	2015	MTMM	FULL	S5A_512394234	5A	512394234	C/T	0.117336	473	1.43088e-09	C	0.0509779	14.1175	C	0.0509779	14.1175
DP	2015	MTMM	COM	S5A_512599946	5A	512599946	C/T	0.115222	473	7.72701e-08	C	0.0469242	14.6331	C	0.0469242	14.6331
DP	2015	MTMM	FULL	S5A_512599946	5A	512599946	C/T	0.121564	473	6.38223e-08	C	0.0469242	14.6331	C	0.0469242	14.6331
DP	2015	MTMM	COM	S5A_512767007	5A	512767007	G/A	0.105708	473	9.61647e-09	G	0.0713168	17.2448	A	0.00253562	0.611196
DP	2015-2017	MTMM	COM	S5A_512767007	5A	512767007	G/A	0.116279	473	3.88065e-09	G	0.0452007	8.38161	A	0.00253562	0.611196
DP	2015-2018	MTMM	COM	S5A_512767007	5A	512767007	G/A	0.116279	473	3.88065e-09	G	0.0289198	5.22042	G	0.0713168	17.2448
DP	2015	MTMM	EM	S5A_512767007	5A	512767007	G/A	0.112051	473	2.1817e-11	G	0.0713168	17.2448	G	0.0452007	8.38161
DP	2015-2018	MTMM	EM	S5A_512767007	5A	512767007	G/A	0.112051	473	2.1817e-11	G	0.0289198	5.22042	G	0.0289198	5.22042
DP	2015	MTMM	FULL	S5A_512767007	5A	512767007	G/A	0.114165	473	1.91934e-07	G	0.0713168	17.2448	G	0.0713168	17.2448
DP	2015-2017	MTMM	FULL	S5A_512767007	5A	512767007	G/A	0.107822	473	5.46553e-09	G	0.0452007	8.38161	G	0.0452007	8.38161
DP	2015-2018	MTMM	FULL	S5A_512767007	5A	512767007	G/A	0.102537	473	9.56293e-08	G	0.0289198	5.22042	G	0.0289198	5.22042
DP	2015	MTMM	COM	S5A_513404692	5A	513404692	T/C	0.0443975	473	1.93091e-15	T	0.0740471	17.9258	C	0.00295158	0.672708
DP	2015-2017	MTMM	COM	S5A_513404692	5A	513404692	T/C	0.0443975	473	1.93091e-15	T	0.0458105	8.60793	T	0.0740472	17.9258
DP	2015-2018	MTMM	COM	S5A_513404692	5A	513404692	T/C	0.0528541	473	1.50365e-10	T	0.0241639	4.86802	T	0.0458105	8.60793
DP	2015	MTMM	EM	S5A_513404692	5A	513404692	T/C	0.0422833	473	1.6565e-09	T	0.0740471	17.9258	T	0.0241639	4.86802
DP	2015	MTMM	FULL	S5A_513404692	5A	513404692	T/C	0.442918	473	2.04763e-08	T	0.0740471	17.9258	T	0.0740472	17.9258
DP	2015-2017	MTMM	FULL	S5A_513404692	5A	513404692	T/C	0.0665962	473	9.80802e-09	T	0.0458105	8.60793	T	0.0458105	8.60793
DP	2015-2018	MTMM	FULL	S5A_513404692	5A	513404692	T/C	0.124736	473	2.52757e-07	T	0.0241639	4.86802	T	0.0241639	4.86802
DP	2015	MTMM	COM	S5A_514092714	5A	514092714	T/C	0.05074	473	8.89472e-07	T	0.0663384	16.1429	C	0.00288336	0.632591
DP	2015-2017	MTMM	COM	S5A_514092714	5A	514092714	T/C	0.0338266	473	4.12838e-07	T	0.04191	7.83338	T	0.0663384	16.1429
DP	2015-2018	MTMM	COM	S5A_514092714	5A	514092714	T/C	0.381607	473	4.12343e-09	T	0.0227193	4.49097	T	0.04191	7.83338
DP	2015	MTMM	EM	S5A_514092714	5A	514092714	T/C	0.383721	473	4.85363e-08	T	0.0663384	16.1429	T	0.0227193	4.49097
DP	2015	MTMM	FULL	S5A_514092714	5A	514092714	T/C	0.383721	473	5.93568e-07	T	0.0663384	16.1429	T	0.0663384	16.1429
DP	2015-2017	MTMM	FULL	S5A_514092714	5A	514092714	T/C	0.489429	473	2.08977e-09	T	0.04191	7.83338	T	0.04191	7.83338
DP	2015-2018	MTMM	FULL	S5A_514092714	5A	514092714	T/C	0.497886	473	7.51501e-07	T	0.0227193	4.49097	T	0.0227193	4.49097
DP	2015	MTMM	COM	S5A_514260464	5A	514260464	C/T	0.212474	473	5.18245e-08	C	0.0792865	19.1831	T	0.004729	0.880603
DP	2015-2017	MTMM	COM	S5A_514260464	5A	514260464	C/T	0.199789	473	3.31798e-07	C	0.0478405	9.09724	T	0.004729	0.880602
DP	2015-2018	MTMM	COM	S5A_514260464	5A	514260464	C/T	0.199789	473	3.31798e-07	C	0.0258445	5.20654	C	0.0792865	19.1831
DP	2015	MTMM	EM	S5A_514260464	5A	514260464	C/T	0.194503	473	5.0553e-07	C	0.0792865	19.1831	C	0.0478405	9.09724
DP	2015-2017	MTMM	EM	S5A_514260464	5A	514260464	C/T	0.174419	473	1.32641e-08	C	0.0478405	9.09724	C	0.0258445	5.20654
DP	2015	MTMM	FULL	S5A_514260464	5A	514260464	C/T	0.176533	473	1.959e-07	C	0.0792865	19.1831	C	0.0792865	19.1831
DP	2015-2017	MTMM	FULL	S5A_514260464	5A	514260464	C/T	0.176533	473	6.32691e-08	C	0.0478405	9.09724	C	0.0478405	9.09724
DP	2015-2018	MTMM	FULL	S5A_514260464	5A	514260464	C/T	0.165962	473	2.50661e-08	C	0.0258445	5.20654	C	0.0258445	5.20654
DP	2015	MTMM	COM	S5A_514279902	5A	514279902	A/G	0.0443975	473	1.19109e-08	A	0.0729845	17.4913	G	0.00319371	0.687747
DP	2015-2017	MTMM	COM	S5A_514279902	5A	514279902	A/G	0.0443975	473	1.19109e-08	A	0.0483869	8.69484	G	0.00319371	0.687747
DP	2015-2018	MTMM	COM	S5A_514279902	5A	514279902	A/G	0.0422833	473	1.18882e-06	A	0.0262967	4.99115	A	0.0729845	17.4913
DP	2015	MTMM	EM	S5A_514279902	5A	514279902	A/G	0.410148	473	1.12768e-06	A	0.0729845	17.4913	A	0.0483869	8.69484
DP	2015-2017	MTMM	EM	S5A_514279902	5A	514279902	A/G	0.0972516	473	1.48239e-07	A	0.0483869	8.69484	A	0.0262967	4.99115
DP	2015	MTMM	FULL	S5A_514279902	5A	514279902	A/G	0.117336	473	3.51177e-08	A	0.0729845	17.4913	A	0.0729845	17.4913
DP	2015-2017	MTMM	FULL	S5A_514279902	5A	514279902	A/G	0.115222	473	1.75105e-08	A	0.0483869	8.69484	A	0.0483869	8.69484
DP	2015-2018	MTMM	FULL	S5A_514279902	5A	514279902	A/G	0.121564	473	4.01519e-08	A	0.0262967	4.99115	A	0.0262967	4.99115
DP	2015	MTMM	COM	S5A_514279958	5A	514279958	A/G	0.105708	473	6.07545e-10	A	0.0729845	17.4913	G	0.00319371	0.687747
DP	2015-2017	MTMM	COM	S5A_514279958	5A	514279958	A/G	0.116279	473	5.165e-09	A	0.0483869	8.69484	G	0.00319371	0.687747
DP	2015-2018	MTMM	COM	S5A_514279958	5A	514279958	A/G	0.116279	473	5.165e-09	A	0.0262967	4.99115	A	0.0729845	17.4913
DP	2015	MTMM	EM	S5A_514279958	5A	514279958	A/G	0.112051	473	1.01295e-09	A	0.0729845	17.4913	A	0.0483869	8.69484
DP	2015-2017	MTMM	EM	S5A_514279958	5A	514279958	A/G	0.112051	473	1.01295e-09	A	0.0483869	8.69484	A	0.0262967	4.99115
DP	2015	MTMM	FULL	S5A_514279958	5A	514279958	A/G	0.114165	473	3.36859e-08	A	0.0729845	17.4913	A	0.0729845	17.4913
DP	2015-2017	MTMM	FULL	S5A_514279958	5A	514279958	A/G	0.107822	473	1.60377e-08	A	0.0483869	8.69484	A	0.0483869	8.69484
DP	2015-2018	MTMM	FULL	S5A_514279958	5A	514279958	A/G	0.102537	473	9.18698e-08	A	0.0262967	4.99115	A	0.0262967	4.99115
DP	2015	MTMM	COM	S5A_514296253	5A	514296253	G/A	0.0443975	473	1.69245e-09	G	0.0773379	18.1752	A	0.000519341	0.279953
DP	2015-2017	MTMM	COM	S5A_514296253	5A	514296253	G/A	0.0443975	473	1.69245e-09	G	0.0533207	9.21347	A	0.000519341	0.279953
DP	2015-2018	MTMM	COM	S5A_514296253	5A	514296253	G/A	0.0528541	473	6.19427e-07	G	0.0326727	5.61591	A	0.000519341	0.279953
DP	2015	MTMM	EM	S5A_514296253	5A	514296253	G/A	0.105708	473	4.27967e-07	G	0.0773379	18.1752	G	0.0773378	18.1752
DP	2015-2017	MTMM	EM	S5A_514296253	5A	514296253	G/A	0.116279	473	3.75799e-07	G	0.0533207	9.21347	G	0.0533207	9.21347
DP	2015-2018	MTMM	EM	S5A_514296253	5A	514296253	G/A	0.116279	473	3.75799e-07	G	0.0326727	5.61591	G	0.0326727	5.61591
DP	2015	MTMM	FULL	S5A_514296253	5A	514296253	G/A	0.112051	473	4.38845e-08	G	0.0773379	18.1752	G	0.0773378	18.1752
DP	2015-2017	MTMM	FULL	S5A_514296253	5A	514296253	G/A	0.112051	473	4.38845e-08	G	0.0533207	9.21347	G	0.0533207	9.21347
DP	2015-2018	MTMM	FULL	S5A_514296253	5A	514296253	G/A	0.0443975	473	3.74128e-09	G	0.0326727	5.61591	G	0.0326727	5.61591
DP	2015	MTMM	COM	S5A_514296259	5A	514296259	C/T	0.0443975	473	3.74128e-09	C	0.0773379	18.1752	T	0.000519341	0.279953
DP	2015-2017	MTMM	COM	S5A_514296259	5A	514296259	C/T	0.489429	473	1.10242e-06	C	0.0533207	9.21347	T	0.000519341	0.279953
DP	2015-2018	MTMM	COM	S5A_514296259	5A	514296259	C/T	0.117336	473	1.15203e-06	C	0.0326727	5.61591	T	0.000519341	0.279953
DP	2015	MTMM	EM	S5A_514296259	5A	514296259	C/T	0.112051	473	9.73751e-08	C	0.0773379	18.1752	C	0.0773378	18.1752
DP	2015-2017	MTMM	EM	S5A_514296259	5A	514296259	C/T	0.112051	473	9.73751e-08	C	0.0533207	9.21347	C	0.0533207	9.21347
DP	2015-2018	MTMM	EM	S5A_514296259	5A	514296259	C/T	0.0443975	473	1.03558e-09	C	0.0326727	5.61591	C	0.0326727	5.61591
DP	2015	MTMM	FULL	S5A_514296259	5A	514296259	C/T	0.0443975	473	1.03558e-09	C	0.0773379	18.1752	C	0.0773378	18.1752
DP	2015-2017	MTMM	FULL	S5A_514296259	5A	514296259	C/T	0.0528541	473	8.02192e-07	C	0.0533207	9.21347	C	0.0533207	9.21347
DP	2015-2018	MTMM	FULL	S5A_514296259	5A	514296259	C/T	0.489429	473	1.13697e-06	C	0.0326727	5.61591	C	0.0326727	5.61591
DP	2015	MTMM	COM	S5A_514296299	5A	514296299	A/G	0.108879	473	1.02136e-06	A	0.0528258	13.5817	A	0.0528258	13.5817
DP	2015	MTMM	FULL	S5A_514296299	5A	514296299	A/G	0.339323	473	3.93699e-09	A	0.0528258	13.5817	A	0.0528258	13.5817
DP	2015	MTMM	COM	S5A_514408271	5A	514408271	C/T	0.307611	473	2.67629e-08	C	0.0687306	17.3335	T	0.00327193	0.710868
DP	2015-2017	MTMM	COM	S5A_514408271	5A	514408271	C/T	0.284355	473	2.57097e-07	C	0.0421822	8.29026	C	0.0687306	17.3335
DP	2015-2018	MTMM	COM	S5A_514408271	5A	514408271	C/T	0.412262	473	9.73837e-08	C	0.0228219	4.74824	C	0.0421822	8.29026
DP	2015	MTMM	EM	S5A_514408271	5A	514408271	C/T	0.400634	473	5.01381e-08	C	0.0687306	17.3335	C	0.0228219	4.74824
DP	2015	MTMM	FULL	S5A_514408271	5A	514408271	C/T	0.404863	473	7.51893e-08	C	0.0687306	17.3335	C	0.0687306	17.3335
DP	2015-2017	MTMM	FULL	S5A_514408271	5A	514408271	C/T	0.0972516	473	1.79587e-12	C	0.0421822	8.29026	C	0.0421822	8.29026
DP	2015-2018	MTMM	FULL	S5A_514408271	5A	514408271	C/T	0.11945	473	3.48515e-10	C	0.0228219	4.74824	C	0.0228219	4.74824
DP	2015	MTMM	COM	S5A_517250500	5A	517250500	C/A	0.11945	473	3.48515e-10	A	0.0476534	19.4356	A	0.0476534	19.4356
DP	2015	MTMM	FULL	S5A_517250500	5A	517250500	C/A	0.10148	473	6.47853e-10	A	0.0476534	19.4356	A	0.0476534	19.4356
DP	2015	MTMM	COM	S5A_519892082	5A	519892082	C/G	0.117336	473	9.23653e-14	C	0.0704629	17.993	G	0.00125984	0.452226
DP	2015-2017	MTMM	COM	S5A_519892082	5A	519892082	C/G	0.115222	473	2.13095e-14	C	0.0422427	8.50534	C	0.0704629	17.993
DP	2015-2018	MTMM	COM	S5A_519892082	5A	519892082	C/G	0.121564	473	1.53043e-13	C	0.0255857	5.15427	C	0.0422428	8.50534
DP	2015	MTMM	EM	S5A_519892082	5A	519892082	C/G	0.105708	473	3.19484e-17	C	0.0704629	17.993	C	0.0255857	5.15427
DP	2015	MTMM	FULL	S5A_519892082	5A	519892082	C/G	0.116279	473	2.39523e-15	C	0.0704629	17.993	C	0.0704629	17.993
DP	2015-2017	MTMM	FULL	S5A_519892082	5A	519892082	C/G	0.116279	473	2.39523e-15	C	0.0422427	8.50534	C	0.0422428	8.50534
DP	2015-2018	MTMM	FULL	S5A_519892082	5A	519892082	C/G	0.112051	473	1.95304e-16	C	0.0255857	5.15427	C	0.0255857	5.15427
DP	2015	MTMM	COM	S5A_520532187	5A	520532187	T/G	0.112051	473	1.95304e-16	T	0.0680768	17.681	G	0.00116215	0.434223
DP	2015-2017	MTMM	COM	S5A_520532187	5A	520532187	T/G	0.209302	473	5.17621e-09	T	0.0404857	8.32432	T	0.0680768	17.681
DP	2015-2018	MTMM	COM	S5A_520532187	5A	520532187	T/G	0.114165	473	8.3813e-14	T	0.0238489	4.97491	T	0.0404857	8.32432
DP	2015	MTMM	EM	S5A_520532187	5A	520532187	T/G	0.472516	473	8.25215e-08	T	0.0680768	17.681	T	0.0238489	4.97491
DP	2015	MTMM	FULL	S5A_520532187	5A	520532187	T/G	0.107822	473	2.18527e-14	T	0.0680768	17.681	T	0.0680768	17.681
DP	2015-2017	MTMM	FULL	S5A_520532187	5A	520532187	T/G	0.102537	473	4.78963e-13	T	0.0404857	8.32432	T	0.0404857	8.32432
DP	2015-2018	MTMM	FULL	S5A_520532187	5A	520532187	T/G	0.141649	473	3.32072e-07	T	0.0238489	4.97491	T	0.0238489	4.97491
DP	2015	MTMM	COM	S5A_521475401	5A	521475401	C/G	0.0443975	473	7.75298e-17	C	0.037187	13.2449	C	0.037187	13.2449
DP	2015	MTMM	FULL	S5A_521475401	5A	521475401	C/G	0.0443975	473	7.75298e-17	C	0.037187	13.2449	C	0.037187	13.2449
DP	2015	MTMM	COM	S5A_522153944	5A	522153944	T/C	0.0528541	473	1.77864e-11	T	0.0874014	29.3886	C	7.34278e-05	0.160113
DP	2015-2017	MTMM	COM	S5A_522153944	5A	522153944	T/C	0.0422833	473	3.37282e-09	T	0.0807118	17.2417	C	7.34278e-05	0.160112
DP	2015-2018	MTMM	COM	S5A_522153944	5A	522153944	T/C	0.442918	473	1.05931e-07	T	0.100248	14.9624	C	7.34278e-05	0.160113
DP	2015-2019	MTMM	COM	S5A_522153944	5A	522153944	T/C	0.171247	473	9.12439e-07	T	0.0577738	11.8704	T	0.0874014	29.3886
DP	2015	MTMM	EM	S5A_522153944	5A	522153944	T/C	0.350951	473	1.06751e-09	T	0.0874014	29.3886	T	0.0807118	17.2417
DP	2015-2017	MTMM	EM	S5A_522153944	5A	522153944	T/C	0.488372	473	2.67473e-08	T	0.0807118	17.2417	T	0.100248	14.9624
DP	2015-2018	MTMM	EM	S5A_522153944	5A	522153944	T/C	0.410148	473	7.47091e-09	T	0.100248	14.9624	T	0.0577738	11.8704
DP	2015	MTMM	FULL	S5A_522153944	5A	522153944	T/C	0.250529	473	2.04712e-07	T	0.0874014	29.3886	T	0.0874014	29.3886
DP	2015-2017	MTMM	FULL	S5A_522153944	5A	522153944	T/C	0.250529	473	2.04712e-07	T	0.0807118	17.2417	T	0.0807118	17.2417
DP	2015-2018	MTMM	FULL	S5A_522153944	5A	522153944	T/C	0.250529	473	2.04712e-07	T	0.100248	14.9624	T	0.100248	14.9624
DP	2015-2019	MTMM	FULL	S5A_522153944	5A	522153944	T/C	0.250529	473	9.16531e-08	T	0.0577738	11.8704	T	0.0577738	11.8704
DP	2015	MTMM	COM	S5A_522153953	5A	522153953	A/G	0.250529	473	9.16531e-08	A	0.0874014	29.3886	G	7.34278e-05	0.160113
DP	2015-2017	MTMM	COM	S5A_522153953	5A	522153953	A/G	0.250529	473	9.16531e-08	A	0.0807118	17.2417	G	7.34278e-05	0.160112
DP	2015-2018	MTMM	COM	S5A_522153953	5A	522153953	A/G	0.320296	473	7.37621e-07	A	0.100248	14.9624	G	7.34278e-05	0.160113
DP	2015-2019	MTMM	COM	S5A_522153953	5A	522153953	A/G	0.0486258	473	1.00599e-06	A	0.0577738	11.8704	A	0.0874014	29.3886
DP	2015	MTMM	EM	S5A_522153953	5A	522153953	A/G	0.320296	473	6.57146e-07	A	0.0874014	29.3886	A	0.0807118	17.2417
DP	2015-2017	MTMM	EM	S5A_522153953	5A	522153953	A/G	0.0739958	473	7.78762e-07	A	0.0807118	17.2417	A	0.100248	14.9624
DP	2015-2018	MTMM	EM	S5A_522153953	5A	522153953	A/G	0.32241	473	5.61936e-07	A	0.100248	14.9624	A	0.0577738	11.8704
DP	2015	MTMM	FULL	S5A_522153953	5A	522153953	A/G	0.0338266	473	7.36839e-10	A	0.0874014	29.3886	A	0.0874014	29.3886
DP	2015-2017	MTMM	FULL	S5A_522153953	5A	522153953	A/G	0.0475687	473	3.83316e-09	A	0.0807118	17.2417	A	0.0807118	17.2417
DP	2015-2018	MTMM	FULL	S5A_522153953	5A	522153953	A/G	0.0369979	473	1.19305e-06	A	0.100248	14.9624	A	0.100248	14.9624
DP	2015-2019	MTMM	FULL	S5A_522153953	5A	522153953	A/G	0.404863	473	5.19426e-08	A	0.0577738	11.8704	A	0.0577738	11.8704
DP	2015	MTMM	COM	S5A_523025549	5A	523025549	A/G	0.387949	473	1.18909e-06	A	0.0627325	23.1781	A	1.67846e-07	0.00712626
DP	2015-2017	MTMM	COM	S5A_523025549	5A	523025549	A/G	0.489429	473	3.11926e-08	A	0.050107	12.6466	A	1.67846e-07	0.00712626
DP	2015-2018	MTMM	COM	S5A_523025549	5A	523025549	A/G	0.339323	473	8.52858e-07	A	0.071354	11.7513	A	0.0627325	23.1781
DP	2015	MTMM	EM	S5A_523025549	5A	523025549	A/G	0.307611	473	6.28019e-07	A	0.0627325	23.1781	A	0.050107	12.6466
DP	2015-2018	MTMM	EM	S5A_523025549	5A	523025549	A/G	0.108879	473	7.54356e-07	A	0.071354	11.7513	A	0.071354	11.7513
DP	2015	MTMM	FULL	S5A_523025549	5A	523025549	A/G	0.0972516	473	8.89632e-08	A	0.0627325	23.1781	A	0.0427738	9.50827
DP	2015-2017	MTMM	FULL	S5A_523025549	5A	523025549	A/G	0.117336	473	5.0156e-10	A	0.050107	12.6466	A	0.0627325	23.1781
DP	2015-2018	MTMM	FULL	S5A_523025549	5A	523025549	A/G	0.115222	473	4.32657e-10	A	0.071354	11.7513	A	0.050107	12.6466
DP	2015-2019	MTMM	FULL	S5A_523025549	5A	523025549	A/G	0.121564	473	1.06801e-09	A	0.0427738	9.50827	A	0.071354	11.7513
DP	2015	MTMM	COM	S5A_523147137	5A	523147137	G/A	0.105708	473	3.18527e-11	G	0.0595243	27.7186	G	0.0595243	27.7186
DP	2015-2017	MTMM	COM	S5A_523147137	5A	523147137	G/A	0.116279	473	2.79389e-11	G	0.0535421	16.0496	G	0.0535421	16.0496
DP	2015-2018	MTMM	COM	S5A_523147137	5A	523147137	G/A	0.116279	473	2.79389e-11	G	0.0700604	14.2957	G	0.0700604	14.2957
DP	2015-2019	MTMM	COM	S5A_523147137	5A	523147137	G/A	0.112051	473	9.21014e-13	G	0.0454041	12.0269	G	0.0595243	27.7186
DP	2015	MTMM	FULL	S5A_523147137	5A	523147137	G/A	0.112051	473	9.21014e-13	G	0.0595243	27.7186	G	0.0535421	16.0496
DP	2015-2017	MTMM	FULL	S5A_523147137	5A	523147137	G/A	0.114165	473	2.19397e-09	G	0.0535421	16.0496	G	0.0700604	14.2957
DP	2015-2018	MTMM	FULL	S5A_523147137	5A	523147137	G/A	0.107822	473	1.50703e-09	G	0.0700604	14.2957	G	0.0454041	12.0269
DP	2015	MTMM	COM	S5A_523760201	5A	523760201	T/C	0.102537	473	1.60897e-08	C	0.039433	14.1602	C	0.039433	14.1602
DP	2015-2018	MTMM	COM	S5A_523760201	5A	523760201	T/C	0.0443975	473	1.53599e-15	C	0.0509588	7.65231	C	0.0509588	7.65231
DP	2015	MTMM	FULL	S5A_523760201	5A	523760201	T/C	0.0443975	473	1.53599e-15	C	0.039433	14.1602	C	0.039433	14.1602
DP	2015-2018	MTMM	FULL	S5A_523760201	5A	523760201	T/C	0.0528541	473	4.755e-09	C	0.0509588	7.65231	C	0.0509588	7.65231
DP	2015	MTMM	FULL	S5A_529809841	5A	529809841	T/C	0.0422833	473	1.10772e-08	T	0.0385981	12.6028	T	0.0385981	12.6028
DP	2015	MTMM	COM	S5A_535147597	5A	535147597	T/C	0.0665962	473	9.80832e-08	T	0.060338	11.9957	T	0.060338	11.9957
DP	2015	MTMM	FULL	S5A_535147597	5A	535147597	T/C	0.410148	473	1.658e-08	T	0.060338	11.9957	T	0.060338	11.9957
DP	2015	MTMM	COM	S5A_537252134	5A	537252134	C/G	0.250529	473	1.05567e-08	C	0.0241278	7.65073	C	0.0241278	7.65073
DP	2015	MTMM	FULL	S5A_537252134	5A	537252134	C/G	0.250529	473	1.05567e-08	C	0.0241278	7.65073	C	0.0241278	7.65073
DP	2015-2017	MTMM	COM	S5A_567120912	5A	567120912	G/A	0.250529	473	1.05567e-08	G	0.0400084	10.0742	G	0.0400084	10.0742
DP	2015-2018	MTMM	COM	S5A_567120912	5A	567120912	G/A	0.489429	473	3.83535e-10	G	0.049437	8.71992	G	0.049437	8.71992
DP	2015-2017	MTMM	FULL	S5A_567120912	5A	567120912	G/A	0.0993658	473	4.51587e-08	G	0.0400084	10.0742	G	0.0400084	10.0742
DP	2015-2018	MTMM	FULL	S5A_567120912	5A	567120912	G/A	0.0930233	473	3.52166e-08	G	0.049437	8.71992	G	0.049437	8.71992
DP	2018	MTMM	COM	S5B_304818833	5B	304818833	G/T	0.0845666	473	3.82792e-07	G	0.0401757	21.1171	G	0.0401757	21.1171
DP	2015	MTMM	COM	S5B_491273019	5B	491273019	G/T	0.114165	473	2.81571e-09	G	0.0573141	23.937	G	0.0573141	23.937
DP	2015-2017	MTMM	COM	S5B_491273019	5B	491273019	G/T	0.118393	473	1.46804e-09	G	0.0487597	13.4791	G	0.0487597	13.4791
DP	2015-2019	MTMM	COM	S5B_491273019	5B	491273019	G/T	0.110994	473	8.83039e-10	G	0.0267108	8.11828	G	0.0573141	23.937
DP	2015	MTMM	FULL	S5B_491273019	5B	491273019	G/T	0.108879	473	3.54273e-10	G	0.0573141	23.937	G	0.0487597	13.4791
DP	2015-2017	MTMM	FULL	S5B_491273019	5B	491273019	G/T	0.11945	473	6.12978e-10	G	0.0487597	13.4791	G	0.0267108	8.11828
DP	2019	MTMM	FULL	S5B_696647050	5B	696647050	G/A	0.284355	473	1.20468e-07	G	0.0348848	18.6595	G	0.0348847	18.6595
DP	2015	MTMM	CL	S6A_543395015	6A	543395015	T/G	0.117336	473	9.21414e-10	G	3.67093e-05	5.03756	G	0.0485499	34.4351
DP	2017	MTMM	CL	S6A_543395015	6A	543395015	T/G	0.115222	473	5.8492e-08	G	0.00514308	32.7148	G	0.0485499	34.4351
DP	2018	MTMM	CL	S6A_543395015	6A	543395015	T/G	0.121564	473	5.61016e-08	T	0.00161474	24.7571	G	0.0485499	34.4351
DP	2015-2017	MTMM	CL	S6A_543395015	6A	543395015	T/G	0.105708	473	4.5401e-09	G	0.00139084	18.9305	G	0.0485499	34.4351
DP	2015-2018	MTMM	CL	S6A_543395015	6A	543395015	T/G	0.116279	473	2.39406e-09	G	0.000122387	4.37265	G	0.0485499	34.4351
DP	2015-2019	MTMM	CL	S6A_543395015	6A	543395015	T/G	0.116279	473	2.39406e-09	T	0.000244888	6.46393	G	0.0485499	34.4351
DP	2019	MTMM	COM	S6B_715854351	6B	715854351	G/T	0.112051	473	2.22877e-11	T	0.0458357	38.6689	T	0.0458357	38.6689
DP	2019	MTMM	FULL	S6B_715854351	6B	715854351	G/T	0.112051	473	2.22877e-11	T	0.0458357	38.6689	T	0.0458357	38.6689
DP	2015-2018	MTMM	COM	S6D_417061667	6D	417061667	G/C	0.114165	473	1.47184e-07	C	0.0247219	6.10672	C	0.0247219	6.10672
DP	2015-2018	MTMM	FULL	S6D_417061667	6D	417061667	G/C	0.107822	473	5.5623e-09	C	0.0247219	6.10672	C	0.0247219	6.10672
DP	2018	MTMM	COM	S7A_707979819	7A	707979819	T/A	0.102537	473	1.16531e-07	A	0.0341189	13.6304	A	0.0341189	13.6304
DP	2018	MTMM	COM	S7A_707979822	7A	707979822	G/C	0.0443975	473	4.92228e-16	C	0.0341189	13.6304	C	0.0341189	13.6304
DP	2017	MTMM	COM	S7A_709788830	7A	709788830	C/T	0.0443975	473	4.92228e-16	C	0.036886	6.18281	C	0.036886	6.18281
DP	2017	MTMM	FULL	S7A_709788830	7A	709788830	C/T	0.0528541	473	1.37667e-10	C	0.036886	6.18281	C	0.036886	6.18281
DP	2017	MTMM	COM	S7A_709788853	7A	709788853	G/A	0.0422833	473	3.59009e-09	G	0.036886	6.18281	G	0.036886	6.18281
DP	2017	MTMM	FULL	S7A_709788853	7A	709788853	G/A	0.442918	473	3.5734e-08	G	0.036886	6.18281	G	0.036886	6.18281
DP	2017	MTMM	COM	S7A_709788859	7A	709788859	A/T	0.0665962	473	2.6483e-08	A	0.036886	6.18281	A	0.036886	6.18281
DP	2017	MTMM	FULL	S7A_709788859	7A	709788859	A/T	0.124736	473	9.36927e-07	A	0.036886	6.18281	A	0.036886	6.18281
DP	2015-2018	MTMM	COM	S7B_584644006	7B	584644006	T/A	0.346723	473	3.11094e-07	T	0.0610356	13.4582	T	0.0610356	13.4582
DP	2015	MTMM	COM	S7B_663828256	7B	663828256	C/T	0.381607	473	2.99726e-09	T	0.0317773	10.9618	T	0.0317774	10.9618
DP	2015-2017	MTMM	COM	S7B_663828256	7B	663828256	C/T	0.383721	473	3.11273e-08	T	0.0361196	7.13489	T	0.0361196	7.13489
DP	2015	MTMM	FULL	S7B_663828256	7B	663828256	C/T	0.383721	473	1.3642e-07	T	0.0317773	10.9618	T	0.0317774	10.9618
DP	2015-2017	MTMM	FULL	S7B_663828256	7B	663828256	C/T	0.489429	473	2.19027e-10	T	0.0361196	7.13489	T	0.0361196	7.13489
DP	2015	MTMM	COM	S7B_663828309	7B	663828309	A/T	0.212474	473	8.57703e-08	T	0.0317773	10.9618	T	0.0317774	10.9618
DP	2015-2017	MTMM	COM	S7B_663828309	7B	663828309	A/T	0.199789	473	5.16814e-07	T	0.0361196	7.13489	T	0.0361196	7.13489
DP	2015	MTMM	FULL	S7B_663828309	7B	663828309	A/T	0.199789	473	5.16814e-07	T	0.0317773	10.9618	T	0.0317774	10.9618
DP	2015-2017	MTMM	FULL	S7B_663828309	7B	663828309	A/T	0.174419	473	2.16689e-08	T	0.0361196	7.13489	T	0.0361196	7.13489
DP	2015	MTMM	COM	S7B_663828323	7B	663828323	T/G	0.176533	473	4.28366e-07	G	0.0317773	10.9618	G	0.0317774	10.9618
DP	2015-2017	MTMM	COM	S7B_663828323	7B	663828323	T/G	0.176533	473	1.31084e-07	G	0.0361196	7.13489	G	0.0361196	7.13489
DP	2015	MTMM	FULL	S7B_663828323	7B	663828323	T/G	0.165962	473	5.36942e-08	G	0.0317773	10.9618	G	0.0317774	10.9618
DP	2015-2017	MTMM	FULL	S7B_663828323	7B	663828323	T/G	0.0443975	473	3.4733e-09	G	0.0361196	7.13489	G	0.0361196	7.13489
DP	2019	MTMM	COM	S7D_484721428	7D	484721428	C/A	0.0443975	473	3.4733e-09	A	0.0360647	27.5906	A	0.0360646	27.5906
DP	2019	MTMM	FULL	S7D_484721428	7D	484721428	C/A	0.0528541	473	1.21517e-06	A	0.0360647	27.5906	A	0.0360646	27.5906
